# Supplementary material
Source: PubMed Central journal article supplement (PMC3644566)
Supplement: NIHMS438964-supplement-1_si_001.pdf [file NIHMS438964-supplement-1_si_001.pdf]

**Supporting Information**  
**Discovery of Novel Antimalarial Compounds Enabled by**  
**QSAR-Based Virtual Screening**

---

Liyang Zhang, Denis Fourches, Alexander Sedykh, Hao Zhu, Alexander Golbraikh, Sean Ekins, Julie Clark, Michele C. Connelly, Martina Sigal, Dena Hodges, Armand Guiguemde, R. Kiplin Guy, and Alexander Tropsha

**Supplementary Table 1.** Features of 10 sets of DBS models and their external accuracy.

| <b>Model Set ID</b>                             | <b>M0</b> | <b>M1</b> | <b>M2</b> | <b>M3</b> | <b>M4</b> | <b>M5</b> | <b>M6</b> | <b>M7</b> | <b>M8</b> | <b>M9</b> |
|-------------------------------------------------|-----------|-----------|-----------|-----------|-----------|-----------|-----------|-----------|-----------|-----------|
| <b># of Compounds</b>                           | 423       | 421       | 423       | 423       | 422       | 422       | 422       | 423       | 423       | 422       |
| <b># of Accepted models used for prediction</b> | 63        | 71        | 68        | 124       | 27        | 55        | 44        | 58        | 58        | 48        |
| <b># of Descriptors</b>                         | 344       | 342       | 346       | 340       | 342       | 340       | 351       | 352       | 345       | 333       |
| <b>CCR</b>                                      | 0.67      | 0.61      | 0.61      | 0.67      | 0.66      | 0.60      | 0.66      | 0.65      | 0.62      | 0.60      |

**Supplementary Table 2.** Counts of molecules in external evaluation set (70 compounds) that were marked as “inconclusive” at different CPTs for SBS and DBS models, respectively.

| CPT        | 0.55/0.45 | 0.6/0.4 | 0.65/0.35 | 0.7/0.3 | 0.8/0.2 | 0.9/0.1 |
|------------|-----------|---------|-----------|---------|---------|---------|
| SBS Models | 3         | 5       | 7         | 10      | 18      | 24      |
| DBS Models | 9         | 18      | 24        | 34      | 56      | 62      |

**Supplementary Table 3.** Structures, antimalarial activity and drug susceptibility of 176 virtual screening hits.

Chemicals with confirmed antimalarial activity are shown in bold.

| REGNUM             | Smiles                                                                  | Antimalarial Activity (EC50, $\mu$ M) |                  | Drug Susceptibility (EC50, $\mu$ M) |                  |
|--------------------|-------------------------------------------------------------------------|---------------------------------------|------------------|-------------------------------------|------------------|
|                    |                                                                         | 3D7                                   | K1               | BJ                                  | HEPG2            |
| <b>SJ000565000</b> | <b>N12CCC(CC1C(c3ccnc(cccc4)c34)OC(=O)C5CC5)C(C=C)C2.Cl</b>             | <b>0.0956</b>                         | <b>0.3178</b>    | > * <b>19.2663</b>                  | - <sup>†</sup>   |
| <b>SJ000565062</b> | <b>c12c(cccc1)cccc2OCC(O)CN(CCC C)CCCC.Cl</b>                           | <b>1.5466</b>                         | <b>0.1457</b>    | > <b>28.6957</b>                    | <b>11.4906</b>   |
| <b>SJ000565033</b> | <b>c1(cc(C)nc(ccc(OC)c2)c12)Nc(cc3 )ccc3OCC</b>                         | <b>1.7216</b>                         | <b>6.0942</b>    | > <b>27.3641</b>                    | > <b>27.3641</b> |
| <b>SJ000173328</b> | <b>c1(cc(C)nc(ccc(OCC)c2)c12)Nc(cc c(c34)OCCO3)c4.Cl</b>                | <b>1.9858</b>                         | > <b>17.9429</b> | > <b>32.4728</b>                    | > <b>32.4728</b> |
| <b>SJ000565039</b> | <b>c1(ccccc1OCC(O)CNC(C)c2cccc2 )C(C)(C)C.Cl</b>                        | <b>3.0999</b>                         | <b>0.7109</b>    | <b>21.7739</b>                      | > <b>27.2826</b> |
| <b>SJ000565002</b> | <b>c12c(cccc1)ccc(OCC(O)CN(CCCC) CCCC)c2.Cl</b>                         | <b>3.4873</b>                         | <b>0.7575</b>    | > <b>32.3370</b>                    | -                |
| <b>SJ000565115</b> | <b>N(Cc(cc1)ccc1OCc2cccc2)C(C)C( O)c3cccc3.Cl</b>                       | <b>3.8999</b>                         | <b>0.6032</b>    | > <b>30.7609</b>                    | > <b>30.7609</b> |
| <b>SJ000565043</b> | <b>c1(nc(C)cc2Nc3ccc(c(OC)c3)OC)c 2ccc(cccc4)c14</b>                    | <b>3.9945</b>                         | > <b>10.3904</b> | > <b>18.8043</b>                    | <b>6.4956</b>    |
| <b>SJ000205073</b> | <b>N(Cc(cc1)ccc1OCC=C)C(C)C(O)c2 ccccc2.Cl</b>                          | <b>4.9445</b>                         | > <b>12.0420</b> | > <b>21.7935</b>                    | > <b>21.7935</b> |
| <b>SJ000565072</b> | <b>n(ccn1CCCOc(cc2)ccc2C(C)(C)c3c cccc3)c1.C(O)(=O)C(O)=O</b>           | <b>5.3775</b>                         | > <b>12.5225</b> | > <b>22.6630</b>                    | > <b>22.6630</b> |
| <b>SJ000188975</b> | <b>N(CCc(c12)cccc1)(CC(O)COc3ccc( cc3C(C)(C)C)C)C2.Cl</b>               | <b>6.0279</b>                         | <b>1.6561</b>    | > <b>29.5652</b>                    | > <b>29.5652</b> |
| <b>SJ000565117</b> | <b>n(ccn1CCCOc2cccc2Cc3cccc3 )c1.Cl</b>                                 | <b>8.151</b>                          | > <b>20.4805</b> | > <b>37.0652</b>                    | > <b>37.0652</b> |
| <b>SJ000565031</b> | <b>S(N)(=O)(=O)c1ccc(cc1)Nc(c(cc2) c3cc2[N+](=O)[O-])c(cccc4C)c4n 3</b> | > <b>13.6787</b>                      | <b>0.5332</b>    | > <b>24.7554</b>                    | > <b>24.7554</b> |
| <b>SJ000150414</b> | <b>c1(ccccc1OCCN(CC)CC)C(CCc2cc ccc2)=O.Cl</b>                          | > <b>18.7688</b>                      | <b>1.0081</b>    | > <b>33.9674</b>                    | > <b>33.9674</b> |
| <b>SJ000565025</b> | <b>c12c(cccc1)ccc(OCCCCNCCCC)c 2</b>                                    | > <b>13.0931</b>                      | <b>1.3621</b>    | > <b>23.6957</b>                    | <b>12.8188</b>   |
| <b>SJ000564998</b> | <b>[n+]1(C)ccc(c2c1Cc(ccc(c3OC)OC )c3)cc(c(OC)c2)OC.[I-]</b>            | > <b>17.1471</b>                      | <b>2.0551</b>    | > <b>31.0326</b>                    | > <b>31.0326</b> |
| <b>SJ000565010</b> | <b>N1(CCCCC1)CCCCCOc(ccc(c23)cc cc2)c3</b>                              | > <b>12.6426</b>                      | <b>2.4118</b>    | <b>11.1753</b>                      | <b>8.4292</b>    |

\* “Greater than” means that there was a change in effect (i.e., some growth inhibition), but the isotherm did not saturate. Therefore, it doesn’t indicate inactive, but no assignable numeric value for potency.

<sup>†</sup> No dose-response curve was derived from experiments.

|             |                                                             |          |          |          |          |
|-------------|-------------------------------------------------------------|----------|----------|----------|----------|
| SJ000202592 | C(O)(=O)C(O)=O.c1(cc(Cl)ccc1OC<br>CCCNCC(C)O)Cc2cccc2       | >7.0571  | 2.5655   | >12.7717 | >12.7717 |
| SJ000565067 | C(O)(=O)C(O)=O.c1(ccccc1OCCC<br>CN2CCCC2)c3cccc3            | >13.5135 | 3.1098   | >24.4565 | >24.4565 |
| SJ000183110 | C(O)(=O)C(O)=O.N(C)(CCCCO(c<br>1)ccc1CC)Cc2cccc2            | >12.4024 | 4.7387   | >22.4457 | >22.4457 |
| SJ000565003 | c1(c(ccc2C(CC3)(CCO3)CNCCC(c4<br>cccc4)c5cccc5)OCCO1)c2.Cl  | >13.7538 | 5.2169   | 18.1739  | >24.8913 |
| SJ000565071 | C(O)(=O)C(O)=O.C(c1cccc1)(=O)<br>c2ccc(cc2)OCCCCN3CCC(CC3)C | >14.8348 | 6.1013   | >26.8478 | >26.8478 |
| SJ000565094 | N1(CCCCC1)CC(O)COc(cc2)ccc2O<br>Cc3cccc3                    | >14.9550 | 6.1575   | >27.0652 | >27.0652 |
| SJ000565077 | C(O)(=O)C(O)=O.N(C)(CCCCO(c1c<br>ccc(CC)c1)Cc2cccc2         | >16.8168 | 6.2246   | >30.4348 | >30.4348 |
| SJ000565064 | C(CCCC)(CC(OCC)=O)(C1=O)C(=O)<br>)N(N1c2cccc2)c3cccc3       | >16.5616 | 7.9107   | >29.9728 | 26.6172  |
| SJ000565100 | C(O)(=O)C(O)=O.N(CCOc1ccc(cc1<br>OC)CC=C)(CCc(c23)ccc2)C3   | >2.8228  | <0.0001  | >5.1087  | >5.1087  |
| SJ000126082 | C/CC(O)=O)\C(O)=O)=C\C(O)=<br>O                             | >15.0150 | <0.0008  | >27.1739 | -        |
| SJ000039232 | S(N)(=O)(=O)c1ccc(cc1)NC(=O)c(<br>c2c(cccc2)nc3c4cccc4C)c3  | >10.0150 | >10.0150 | >18.1250 | >18.1250 |
| SJ000565120 | c1(OC)cc(CNCc2ccccn2)ccc1OCc(<br>cc3)ccc3F.Cl               | <0.0005  | >10.0300 | >18.1522 | >18.1522 |
| SJ000565058 | c12c(cccn1)cccc2OCCOCCOc(ccc<br>(c3C)C)c3                   | >10.4805 | >10.4805 | >18.9674 | >18.9674 |
| SJ000565036 | c1(C(C)C)ccc(cc1C)OCC(O)CNC(C<br>)c2cccc2.Cl                | >10.7207 | >10.7207 | >19.4022 | >19.4022 |
| SJ000565080 | C(O)(=O)C(O)=O.c1c(cccc1Oc2cc<br>ccc2)OCCCCNC(C)CC          | >10.7808 | >10.7808 | >19.5109 | 7.7858   |
| SJ000565012 | c1(OCCCCCN2CCCC2)cc(C)cc(C)<br>c1C                          | >10.8408 | >10.8408 | >19.6196 | >19.6196 |
| SJ000565023 | n1c(ccc(c23)cccc2)c3c4(CCC4)c<br>1c(cc5OC)cc(c5OC)OC        | >10.8408 | >10.8408 | >19.6196 | >19.6196 |
| SJ000338146 | c1(c(cccc1CNCc(cc2)ccn2)OC)OC<br>c(cc3)ccc3Cl.Cl            | >10.9610 | >10.9610 | >19.8370 | >19.8370 |
| SJ000565005 | N(CCc(c12)cc(c(OC)c1)OC)(Cc(cc<br>3)ccc3c4cccc4)C2          | >11.0210 | >11.0210 | >19.9457 | >19.9457 |
| SJ000565087 | C(O)(=O)C(O)=O.c1(CC)cc(OCCCC<br>NCc2cccc2)ccc1Cl           | >11.1111 | >11.1111 | >20.1087 | 13.6906  |
| SJ000565020 | C1(CCC(CC1)NCCc(cc2)ccc2OC)c<br>3cccc3                      | >11.2012 | >11.2012 | >20.2717 | >20.2717 |
| SJ000203427 | C(COc1cccc1CNCC(C)C)(NCCc2c<br>cccc2)=O.Cl                  | >11.2162 | >11.2162 | >20.2989 | >20.2989 |
| SJ000565028 | n(ccn1CCCCCOc2c(C)cc(cc2C)C)                                | >11.2312 | >11.2312 | >20.3261 | >20.3261 |

|             |                                                       |          |          |          |          |
|-------------|-------------------------------------------------------|----------|----------|----------|----------|
|             | c1                                                    |          |          |          |          |
| SJ000565007 | c1(C)c(C)c(OC)ccc1CN2CCC(CC2)Cc3cccc3                 | >11.2613 | >11.2613 | >20.3804 | -        |
| SJ000506625 | n1(c2cccc2)c(ccc(c3)NCc(cc4)cc c4OCC)c3nc1            | >11.3063 | >11.3063 | >20.4620 | >20.4620 |
| SJ000565124 | c1(OC)cc(CNCc2ccccn2)ccc1OCc3cccc(C)c3.Cl             | >11.4865 | >11.4865 | >20.7880 | >20.7880 |
| SJ000338434 | c1(OC)cc(CNCc(cc2)ccn2)ccc1OCc(cc3)ccc3F.Cl           | >11.5015 | >11.5015 | >20.8152 | >20.8152 |
| SJ000565024 | c12c(cccc1)CCCC2NCc(ccc(c3OC C)OC)c3                  | >11.5015 | >11.5015 | >20.8152 | >20.8152 |
| SJ000565083 | N1(CCOCCOc2cccc(cccc3)c23)CC(C)CC(C)C1.C(O)(=O)C(O)=O | >11.5616 | >11.5616 | >20.9239 | >20.9239 |
| SJ000299062 | c12c(cccc1)cccc2OCCCCCN(CC)C C                        | >11.5916 | >11.5916 | >20.9783 | >20.9783 |
| SJ000565097 | N(CCc(c12)cccc1)(CC(O)COc(ccc(c3C)Cl)c3)C2.Cl         | >11.6216 | >11.6216 | >21.0326 | >21.0326 |
| SJ000331443 | N1(CCC(CC1)Cc2cccc2)Cc(ccc(c3C)OC)c3                  | >11.7417 | >11.7417 | >21.2500 | >21.2500 |
| SJ000565121 | c1(OC)cc(CNCc2ccccn2)ccc1OCc3cccc(Cl)c3.Cl            | >11.7568 | >11.7568 | >21.2772 | >21.2772 |
| SJ000565112 | c1(ccc(cc1OCC)CNCc2cccc2)OC3CCCC3.Cl                  | >11.7718 | >11.7718 | >21.3043 | >21.3043 |
| SJ000565061 | N(Cc1cccc1)(Cc2cccc2)CC(O)COc3cccc3C.Cl               | >11.8018 | >11.8018 | >21.3587 | >21.3587 |
| SJ000565017 | c(c(OC)ccc1c2cccc2)(NCC(CC3)=CCC3C(C)=C)c1            | >11.8318 | >11.8318 | >21.4130 | >21.4130 |
| SJ000203158 | c1(cc(C)ccc1OCCCNCC(C)O)Cc2cccc2.Cl                   | >11.8919 | >11.8919 | >21.5217 | 8.6902   |
| SJ000565085 | c1(C)c(Cl)ccc(OCCCCN(C)Cc2cccc2)c1C.C(O)(=O)C(O)=O    | >11.9520 | >11.9520 | >21.6304 | >21.6304 |
| SJ000565104 | n1cn(c2c1cccc2)CCCCOc(c(c3Cl)C)C)cc3.C(C(=O)O)(=O)O   | >11.9520 | >11.9520 | >21.6304 | >21.6304 |
| SJ000565092 | N(CCCCOc1cccc1c2cccc2)(CC3C)CC(O3)C.C(O)(=O)C(O)=O    | >12.0721 | >12.0721 | >21.8478 | >21.8478 |
| SJ000565096 | c1(OCCCN(CCc(c23)cccc2)C3)cc(C)ccc1C(C)C.Cl           | >12.1321 | >12.1321 | >21.9565 | >21.9565 |
| SJ000565084 | C(O)(=O)C(O)=O.c1(OC)cc(ccc1OCCCN(C)Cc2cccc2)\C=C\C   | >12.1622 | >12.1622 | >22.0109 | >22.0109 |
| SJ000565090 | C(O)(=O)C(O)=O.c1(OCCCNCCc2cccc2)cc(C)ccc1C(C)C       | >12.1622 | >12.1622 | >22.0109 | 10.0292  |
| SJ000565018 | N(CC1)(CCN1C2CCc(c3C2)cccc3)c4cccc4OC                 | >12.1772 | >12.1772 | >22.0380 | >22.0380 |
| SJ000331940 | c1(C)cc(ccc1OC)CN(CCCC)Cc2cccc2                       | >12.2222 | >12.2222 | >22.1196 | -        |

|             |                                                           |          |          |          |          |
|-------------|-----------------------------------------------------------|----------|----------|----------|----------|
| SJ000565059 | N(Cc1cccc1)(Cc2cccc2)CC(O)C<br>Oc(cc3)ccc3C.Cl            | >12.2222 | >12.2222 | >22.1196 | >22.1196 |
| SJ000112434 | C(O)(=O)C(O)=O.c1(cc(ccc1OC)C<br>N(C)CCc2ccccn2)OCc3cccc3 | >12.3123 | >12.3123 | >22.2826 | >22.2826 |
| SJ000334205 | c12c(cccn1)cccc2OCCOCCOc(cc3<br>)ccc3CC                   | >12.3123 | >12.3123 | >22.2826 | >22.2826 |
| SJ000197026 | c1(OCC)cc(ccc1OCC(C)C)CNC(C)c<br>2cccc2.Cl                | >12.4625 | >12.4625 | >22.5543 | >22.5543 |
| SJ000565078 | C(O)(=O)C(O)=O.c1(OCCCCN(C)C<br>c2cccc2)c(C)cc(cc1C)C     | >12.5526 | >12.5526 | >22.7174 | >22.7174 |
| SJ000565081 | C(O)(=O)C(O)=O.c1(OCCCN(C)Cc<br>2cccc2)cc(C)ccc1C(C)C     | >12.6426 | >12.6426 | >22.8804 | >22.8804 |
| SJ000565065 | C(CCCC)(CC(OC)=O)(C1=O)C(=O)<br>N(N1c2cccc2)c3cccc3       | >12.6577 | >12.6577 | >22.9076 | >22.9076 |
| SJ000565022 | n1c(ccc(c23)cccc2)c3c4c(CCC4)c<br>1c(cc5OC)cc(c5O)OC      | >12.7027 | >12.7027 | >22.9891 | >22.9891 |
| SJ000565106 | n1cn(c2c1cccc2)CCOc3ccc(c4c3c<br>ccc4)Cl.C(C(=O)O)(=O)O   | >12.8679 | >12.8679 | >23.2880 | >23.2880 |
| SJ000166650 | c12c(cccn1)cccc2OCCOc3ccc(cc3<br>OC)C                     | >12.8829 | >12.8829 | >23.3152 | >23.3152 |
| SJ000565129 | c1(nccc(cc(c(OC)c2)OC)c12)C(N)<br>c3ccc(c(OC)c3)OC        | >12.8829 | >12.8829 | >23.3152 | >23.3152 |
| SJ000334212 | c12c(cccn1)cccc2OCCOCCOc3ccc<br>(cc3OC)CC=C               | >12.9429 | >12.9429 | >23.4239 | 22.5869  |
| SJ000565032 | n1c(ccc(c23)cccc2)c3c4c(CCC4)c<br>1c5ccc(c(OC)c5)OC       | >12.9730 | >12.9730 | >23.4783 | >23.4783 |
| SJ000565014 | N1(CCC(CC1)C)Cc(ccc(c2OCc3ccc<br>cc3)OC)c2                | >13.0030 | >13.0030 | >23.5326 | -        |
| SJ000565019 | c12c(CCC1)ccc(c2)NCc(cc3)ccc3<br>OCCCC                    | >13.0631 | >13.0631 | >23.6413 | >23.6413 |
| SJ000565095 | N(CCCCOc1ccc(cc1C)C)(CCc(c23)<br>cccc2)C3.Cl              | >13.2733 | >13.2733 | >24.0217 | >24.0217 |
| SJ000565027 | C(O)(=O)C(O)=O.c1(OCC)cc(ccc1<br>OC)CNC(c2cccc2)Cc3cccc3  | >13.3033 | >13.3033 | >24.0761 | >24.0761 |
| SJ000565076 | c1(C)cc(C)ccc1OCCCNCCc2cccc<br>c2                         | >13.3934 | >13.3934 | >24.2391 | >24.2391 |
| SJ000565114 | C(COc1cccc1CNC2CCCC2)(=O)N<br>Cc3cccc3.Cl                 | >13.4084 | >13.4084 | >24.2663 | >24.2663 |
| SJ000565107 | c1(OCc2cccc2)c(OC)cc(cc1Cl)CN<br>Cc(cc3)ccn3.Cl           | >13.6336 | >13.6336 | >24.6739 | >24.6739 |
| SJ000565016 | c1(OC)cc(CCNC(CCc(c23)cccc2)C<br>3)ccc1OC                 | >13.6637 | >13.6637 | >24.7283 | >24.7283 |
| SJ000565044 | N1(CCC(CC1)Cc2cccc2)CC(O)CO<br>c3cccc(OC)c3.Cl            | >13.6637 | >13.6637 | >24.7283 | >24.7283 |
| SJ000565021 | N(CCc(c12)cc(c(OC)c1)OC)(C(CC3                            | >13.6937 | >13.6937 | >24.7826 | >24.7826 |

|             |                                                     |          |          |          |          |
|-------------|-----------------------------------------------------|----------|----------|----------|----------|
|             | )CCC3c4ccccc4)C2                                    |          |          |          |          |
| SJ000196267 | c1(OC)cc(ccc1OCC(C)C)CNC(C)c2ccccc2.Cl              | >13.8739 | >13.8739 | >25.1087 | >25.1087 |
| SJ000565119 | c1(OC)cc(CNCc(cccn2)c2)ccc1OCC(c3cc3Cl)cc3.Cl       | >13.9339 | >13.9339 | >25.2174 | >25.2174 |
| SJ000565079 | C(O)(=O)C(O)=O.c1(OCCCCN(C)C2ccccc2)cc(C)cc(C)c1C   | >13.9640 | >13.9640 | >25.2717 | >25.2717 |
| SJ000565128 | c1(OC)cc(CNCc2ccccc2)ccc1OCC3ccccc3C.Cl             | >13.9940 | >13.9940 | >25.3261 | >25.3261 |
| SJ000204946 | c(c(OCCC)c(OCC)cc1CNCCc2ccccc2)c1Cl.Cl              | >14.0841 | >14.0841 | >25.4891 | >25.4891 |
| SJ000158312 | N(CCc(c12)ccccc1)(CC(O)COc3ccc(cc3OC)CC=C)C2.Cl     | >14.2643 | >14.2643 | >25.8152 | >25.8152 |
| SJ000565130 | c1(OCC)cc(CNCC(C)O)ccc1OCC(cc2C)cc2.Cl              | >14.3544 | >14.3544 | >25.9783 | 19.2475  |
| SJ000565109 | n1cn(c2c1cc(C)c(c2)C)CCCCO3ccccc3C.Cl               | >14.3844 | >14.3844 | >26.0326 | >26.0326 |
| SJ000565073 | C(=N/O)/(c1ccc(c(OC)c1)OC)\c2nccc(cc(c(OC)c3)OC)c23 | >14.3994 | >14.3994 | >26.0598 | 8.1823   |
| SJ000197009 | c1(OCC2ccccc2)c(OCC)cc(cc1Cl)CNCC(C)C               | >14.4745 | >14.4745 | >26.1957 | >26.1957 |
| SJ000565029 | n1(c(cc2)ccc2c3ccccc3)c4c(nc1)ccc4                  | >14.5345 | >14.5345 | >26.3043 | 17.5032  |
| SJ000338135 | c1(OC)cc(CNCc(cc2)ccn2)ccc1OCC3ccccc3C.Cl           | >14.5946 | >14.5946 | >26.4130 | >26.4130 |
| SJ000565015 | N1(C\C=C\c2ccccc2OC)CCC(CC1)Cc3ccccc3               | >14.6547 | >14.6547 | >26.5217 | >26.5217 |
| SJ000565063 | N(C)(C1CCCC1)CC(O)COc(ccc(c23)ccccc2)c3.Cl          | >14.6547 | >14.6547 | >26.5217 | >26.5217 |
| SJ000565037 | N(CCc(c12)ccccc1)(CC(O)COc(cc3)cc(c3C(C)C)C)C2.Cl   | >14.8048 | >14.8048 | >26.7935 | >26.7935 |
| SJ000113011 | c1(c(cccc1CN([H])Cc(cccn2)c2)OC)OCCc(cc3)ccc3F.Cl   | >14.8649 | >14.8649 | >26.9022 | >26.9022 |
| SJ000565013 | c12c(cccc1)ccc2OCCCCCN(CC)CC.Cl                     | >14.9249 | >14.9249 | >27.0109 | -        |
| SJ000333948 | c1(C(C)C)ccc(cc1)OCCOCCO2ccc(cc2OC                  | >15.0150 | >15.0150 | >27.1739 | >27.1739 |
| SJ000334022 | c1(OC)cc(C)ccc1OCCCCO2ccc(cc2C)Cl                   | >15.0150 | >15.0150 | >27.1739 | >27.1739 |
| SJ000334045 | c1(OC)cc(CC=C)ccc1OCCOCCO2ccc(cc2C)C                | >15.0150 | >15.0150 | >27.1739 | >27.1739 |
| SJ000334145 | c1(OC)cc(ccc1OCCCCO2ccccc2Cl)\C=C\C                 | >15.0150 | >15.0150 | >27.1739 | >27.1739 |
| SJ000334362 | c1(OC)cc(C)ccc1OCCCCO2ccccc2C(C)C)c2                | >15.0150 | >15.0150 | >27.1739 | >27.1739 |



|             |                                                    |          |          |          |          |
|-------------|----------------------------------------------------|----------|----------|----------|----------|
| SJ000565001 | c1(O)c(cc(cc1C(C)(C)CCC#N)C(C)(C)C                 | >15.0150 | >15.0150 | >27.1739 | -        |
| SJ000565006 | C1(=O)C(CCC(\C=C\c(cc2)ccc2OC<br>C)=C1)CCc3ccccc3  | >15.0150 | >15.0150 | >27.1739 | -        |
| SJ000565008 | c1c(C)cccc1OCCCCCOc2cccc(C)c<br>2                  | >15.0150 | >15.0150 | >27.1739 | -        |
| SJ000565009 | c1(C)cc(OCCCCOc(ccc(c2C)C)c2)c<br>cc1C             | >15.0150 | >15.0150 | >27.1739 | -        |
| SJ000565011 | c(OCCCCCOc(cc1)ccc1C)(cc2)ccc<br>2C                | >15.0150 | >15.0150 | >27.1739 | >27.1739 |
| SJ000565035 | N(CCc(c12)cccc1)(CC(O)COc3cc(<br>C)ccc3C(C)C)C2.Cl | >15.0150 | >15.0150 | >27.1739 | >27.1739 |
| SJ000565046 | c1(OCCOCCOc2ccc(cc2OC)CC=C)<br>cc(C)cc(C)c1C       | >15.0150 | >15.0150 | >27.1739 | 23.9473  |
| SJ000565047 | c1(OCCCCCOc2cccc(cccn3)c23)c(c<br>ccc1OC)OC        | >15.0150 | >15.0150 | >27.1739 | >27.1739 |
| SJ000565048 | c1(OC)cc(CC=C)ccc1OCCOCCOc(c<br>c2)ccc2C(C)(C)C    | >15.0150 | >15.0150 | >27.1739 | 3.5123   |
| SJ000565049 | c1(OC)cc(CC=C)ccc1OCCCOc2ccc<br>(cc2C)Cl           | >15.0150 | >15.0150 | >27.1739 | 10.7284  |
| SJ000565050 | c1(OC)cc(C)ccc1OCCCCOc(ccc(c2<br>C)Cl)c2           | >15.0150 | >15.0150 | >27.1739 | >27.1739 |
| SJ000565052 | c1(OCCCCCOc2cccc2OC)cc(C)ccc<br>1C(C)C             | >15.0150 | >15.0150 | >27.1739 | >27.1739 |
| SJ000565053 | c1(C)c(C)cccc1OCCCCOc2ccc(cc2<br>OC)CC=C           | >15.0150 | >15.0150 | >27.1739 | 8.1025   |
| SJ000565054 | c1(OCCCCCOc2ccc(cc2OC)C)cc(C)c<br>cc1Cl            | >15.0150 | >15.0150 | >27.1739 | 11.1228  |
| SJ000565055 | c1(C)c(C)cccc1OCCCCOc2ccc(cc2<br>OC)\C=C\C         | >15.0150 | >15.0150 | >27.1739 | >27.1739 |
| SJ000565056 | c1(OCCCCCOc2ccc(cc2OC)C)c(C)cc<br>c(C)c1C          | >15.0150 | >15.0150 | >27.1739 | >27.1739 |
| SJ000565057 | c1(C)c(Cl)ccc(OCCCCOc2cccc(OC)<br>c2)c1C           | >15.0150 | >15.0150 | >27.1739 | >27.1739 |
| SJ000551062 | N(C1CCCC1)CC(O)COc(cc2)ccc2<br>OCc3ccccc3          | >15.0450 | >15.0450 | >27.2283 | >27.2283 |
| SJ000565030 | N12C(=NCC1)SC=C2c3ccccc3.Br                        | >15.0751 | >15.0751 | >27.2826 | >27.2826 |
| SJ000565110 | n1cn(c2c1cc(C)c(c2)C)CCOc3cccc<br>(Cl)c3Cl         | >15.0901 | >15.0901 | >27.3098 | >27.3098 |
| SJ000565038 | N(CCc(c12)cccc1)(CC(O)COc3cc(<br>C)ccc3C)C2.Cl     | >15.2553 | >15.2553 | >27.6087 | >27.6087 |
| SJ000565127 | c1(OCC)cc(CNCc(cc2)ccn2)ccc1O<br>Cc3ccccc3.Cl      | >15.3303 | >15.3303 | >27.7446 | >27.7446 |
| SJ000146936 | N1(CCC(CC1)C)Cc(ccc(c2OC)OCc<br>3ccccc3)c2         | >15.6156 | >15.6156 | >28.2609 | -        |

|             |                                                            |          |          |          |          |
|-------------|------------------------------------------------------------|----------|----------|----------|----------|
| SJ000565069 | c1(C)cc(C)ccc1OCCCCN(C)Cc2ccc<br>cc2                       | >15.6156 | >15.6156 | >28.2609 | >28.2609 |
| SJ000565088 | C(O)(=O)C(O)=O.c1(OC)cc(CC=C)<br>ccc1OCCCNc2ccccc2         | >15.6156 | >15.6156 | >28.2609 | >28.2609 |
| SJ000334298 | c12c(cccn1)cccc2OCCOCCOc3ccc<br>cc3CC                      | >15.7958 | >15.7958 | >28.5870 | >28.5870 |
| SJ000208200 | c12c(cccn1)cccc2OCCOc(cc3)ccc<br>3CCC(C)=O                 | >15.9159 | >15.9159 | >28.8043 | >28.8043 |
| SJ000565004 | C(=C/c1ccccc1)/(NC(C)=O)\C(=O)<br>NC(CCSC)C(O)=O           | >16.0511 | >16.0511 | >29.0489 | >29.0489 |
| SJ000565126 | c1(OC)cc(CNCc(cccn2)c2)ccc1OC<br>c3ccccc3C.Cl              | >16.2162 | >16.2162 | >29.3478 | >29.3478 |
| SJ000158276 | N(CCc(c12)cccc1)(CC(O)COc3ccc(<br>cc3C)C)C2.Cl             | >16.3964 | >16.3964 | >29.6739 | >29.6739 |
| SJ000204340 | c1(OCC)cc(CNCCc2ccccc2)ccc1O<br>CC(C)C.Cl                  | >16.6366 | >16.6366 | >30.1087 | >30.1087 |
| SJ000565042 | n1(c2ccc(cc2)OC)c(ccc(c3)NCc(cc<br>c(c4OC)OC)c4)c3nc1      | >16.8018 | >16.8018 | >30.4076 | >30.4076 |
| SJ000564999 | [n+]1(CC)ccc(c2c1Cc(ccc(c3OC)O<br>C)c3)cc(c(OC)c2)OC.[I-]  | >16.9369 | >16.9369 | >30.6522 | 10.8472  |
| SJ000565066 | C(O)(=O)C(O)=O.C(c1ccccc1)(=O)<br>c2ccc(cc2)OCCCN3CCCCC3   | >17.0270 | >17.0270 | >30.8152 | >30.8152 |
| SJ000565125 | c1(OC)cc(CNCc(cccn2)c2)ccc1OC<br>c3cccc(C)c3.Cl            | >17.0270 | >17.0270 | >30.8152 | >30.8152 |
| SJ000565113 | c1(ccc(cc1OCC)CNCCc2ccccc2)O<br>C3CCCC3.Cl                 | >17.6577 | >17.6577 | 25.3217  | 13.0954  |
| SJ000565099 | N(CCc(c12)cccc1)(CC(O)COc3c(C)<br>cccc3C)C2.Cl             | >18.1682 | >18.1682 | >32.8804 | >32.8804 |
| SJ000565102 | c1(ccc(cc1OCC)CNC(C)c2ccccc2)<br>OC3CCCC3.Cl               | >18.5285 | >18.5285 | >33.5326 | 14.8248  |
| SJ000565070 | C(O)(=O)C(O)=O.C(c1ccccc1)(=O)<br>c2ccc(cc2)OCCN3CCC(CC3)C | >18.7087 | >18.7087 | >33.8587 | >33.8587 |
| SJ000565101 | C(COc1ccccc1CNC2CCCC2)(=O)<br>Nc(cc3)ccc3C.Cl              | >19.0240 | >19.0240 | >34.4293 | >34.4293 |
| SJ000565122 | c1(OCC)cc(CNCc(cccn2)c2)ccc1O<br>Cc3ccccc3.Cl              | >19.5345 | >19.5345 | >35.3533 | >35.3533 |
| SJ000565051 | c12c(cccn1)cccc2OCCOCCOc(c3)<br>cc(cc3C)C                  | >19.8799 | >19.8799 | >35.9783 | >35.9783 |
| SJ000034041 | n1(Cc(cc2)ccc2C)c3c(nc1COc(cc4<br>)ccc4OC)cccc3            | >19.9550 | >19.9550 | >36.1141 | 25.5324  |
| SJ000565118 | n(ccn1CCOc2ccc(cc2Cc3ccccc3)C<br>)c1.Cl                    | >19.9550 | >19.9550 | >36.1141 | >36.1141 |
| SJ000565111 | N(CCc(c12)cccc1)(CC(COCCOc3c(<br>C)cccc3C)O)C2.Cl          | >20.2402 | >20.2402 | >36.6304 | >36.6304 |
| SJ000565108 | N1(CCCOc2ccccc2F)CCC(CC1)Cc3                               | >20.3303 | >20.3303 | >36.7935 | 14.1835  |

|             |                                                     |          |          |          |          |
|-------------|-----------------------------------------------------|----------|----------|----------|----------|
|             | cccc3.Cl                                            |          |          |          |          |
| SJ000198578 | n(c(cccc1)c1n2CCOc3cccc3C(C)CC)c2.Cl                | >20.3604 | >20.3604 | >36.8478 | >36.8478 |
| SJ000565105 | n(c(cccc1)c1n2CCOc(cc3)ccc3c4cccc4)c2               | >5.8258  | >5.8258  | >10.5435 | >10.5435 |
| SJ000565034 | n(\N=C\c(cc1)ccc1OCCOc2cc(C)ccc2C(C)C)(c3)cnn3      | >6.4565  | >6.4565  | >11.6848 | >11.6848 |
| SJ000565103 | N(c1cccc1C)C(COc2cccc2CNC3CCCC3)=O                  | >6.6366  | >6.6366  | >12.0109 | 11.4974  |
| SJ000565075 | C(O)(=O)C(O)=O.c1c(cccc1Oc2ccc2)OCCOCCN(C)Cc3cccc3  | >7.0270  | >7.0270  | >12.7174 | >12.7174 |
| SJ000565098 | N1(CCC(CC1)Cc2cccc2)CC(O)COc3cccc3F.Cl              | >7.6877  | >7.6877  | >13.9130 | >13.9130 |
| SJ000334048 | c1(cc(C)ccc1OCCOCCOc2cccc(cccn3)c23)C(C)(C)C        | >7.7477  | >7.7477  | >14.0217 | >14.0217 |
| SJ000177447 | C(O)(=O)C(O)=O.C(c1cccc1)(=O)c2ccc(cc2)OCCCN(CC)CC  | >7.8679  | >7.8679  | >14.2391 | >14.2391 |
| SJ000156724 | c1(cc(ccc1OC)CNC(CC)CC)OCc2cccc2                    | >8.0480  | >8.0480  | >14.5652 | >14.5652 |
| SJ000565068 | C(O)(=O)C(O)=O.c1(OCCCNc2ccc2)cc(C)ccc1C(C)C        | >8.0480  | >8.0480  | >14.5652 | >14.5652 |
| SJ000565040 | N1(CCCCCOc2c(C)cccc2C)CCC(CC1)C                     | >8.3483  | >8.3483  | >15.1087 | >15.1087 |
| SJ000565116 | c1(OC)cc(ccc1OCC(O)c2cccc2)CNC3CCCC3.Cl             | >8.5586  | >8.5586  | >15.4891 | >15.4891 |
| SJ000565045 | n(\N=C\c1cccc(OCCOc2ccc(cc2O)C)CC=C)c1)(cnn3)c3     | >8.6486  | >8.6486  | >15.6522 | >15.6522 |
| SJ000565089 | N(CCCCOc(ccc(c12)cccc1)c2)(CC3C)CC(O3)C             | >8.7988  | >8.7988  | >15.9239 | -        |
| SJ000565091 | c1(ccccc1OCCCN(C)Cc2cccc2)C(C)CC                    | >8.8589  | >8.8589  | >16.0326 | >16.0326 |
| SJ000565060 | c12c(cccc1)cccc2OCC(O)CN(CCC)CCC.Cl                 | >9.0090  | >9.0090  | >16.3043 | >16.3043 |
| SJ000565074 | C(O)(=O)C(O)=O.c1(Cl)cc(C)cc(C)c1OCCCNc2cccc2       | >9.2192  | >9.2192  | >16.6848 | >16.6848 |
| SJ000565123 | c1(OC)cc(CNCc2ccccn2)ccc1OCc(cc3)ccc3C.Cl           | >9.2192  | >9.2192  | >16.6848 | >16.6848 |
| SJ000565082 | n1c(C)ccc(cccc2OCCOCCOc3c(C)cccc3CC=C)c12           | >9.6396  | >9.6396  | >17.4457 | >17.4457 |
| SJ000565093 | n(CC(O)COc(cc1)ccc1OCc2cccc2)(c3c(n4)cccc3)c4       | >9.7147  | >9.7147  | >17.5815 | >17.5815 |
| SJ000565026 | c12c(cccc1)cccc2OCCCCNCCCC                          | >9.7598  | >9.7598  | >17.6630 | >17.6630 |
| SJ000565041 | C(O)(=O)C(O)=O.N1(CCCCOc(ccc(c23)cccc2)c3)CCC(CC1)C | >9.7898  | >9.7898  | >17.7174 | >17.7174 |
| SJ000565086 | c1(C)cc(C)ccc1OCCCN(C)C2ccc                         | >9.9399  | >9.9399  | >17.9891 | >17.9891 |

|  |     |  |  |  |  |
|--|-----|--|--|--|--|
|  | cc2 |  |  |  |  |
|--|-----|--|--|--|--|

**Supplementary Table 4.** Structures, antimalarial activity and drug susceptibility of 42 putative inactives selected by QSAR models.

| REGNUM      | Smiles                                                                   | Antimalarial Activity (EC50, $\mu$ M) |          | Drug Susceptibility (EC50, $\mu$ M) |
|-------------|--------------------------------------------------------------------------|---------------------------------------|----------|-------------------------------------|
|             |                                                                          | 3D7                                   | K1       | BJ                                  |
| SJ000016645 | <chem>C(Oc1ccccc1)(=C(C)O2)C(=O)c(c23)ccc(O)c3O</chem>                   | >15.0150                              | >15.0150 | >27.1739                            |
| SJ000016649 | <chem>C(Oc1ccccc1)(=C(C)O2)C(=O)c(c23)ccc(O)c3C</chem>                   | >15.0150                              | >15.0150 | >27.1739                            |
| SJ000043189 | <chem>C1(Oc2cccc(OC)c2)=C(C)Oc3c(ccc(O)c3)C1=O</chem>                    | >15.0150                              | >15.0150 | >27.1739                            |
| SJ000169987 | <chem>c(ccc(c1C)OC(C)=O)(C2=O)c1OC=C2Oc3ccccc3</chem>                    | >15.0150                              | >15.0150 | >27.1739                            |
| SJ000170212 | <chem>c(ccc(c1C)O)(C2=O)c1OC=C2Oc3ccccc3</chem>                          | >15.0150                              | >15.0150 | >27.1739                            |
| SJ000170220 | <chem>C(Oc1ccccc1F)(=C(C)O2)C(=O)c(c23)ccc(O)c3C</chem>                  | >15.0150                              | >15.0150 | >27.1739                            |
| SJ000170354 | <chem>C(Oc1ccccc1F)(=COc2c3ccc(OC)c2C)C3=O</chem>                        | >15.0150                              | >15.0150 | >27.1739                            |
| SJ000170391 | <chem>C(Oc1ccccc1F)(=C(C)O2)C(=O)c(c23)ccc(O)c3CN(C)C</chem>             | >10.0000                              | >10.0000 | >18.0978                            |
| SJ000170503 | <chem>c1(c(cc(O)c(CC)c1)OC=C2Oc(cc3)ccc3F)C2=O</chem>                    | >15.0150                              | >15.0150 | >27.1739                            |
| SJ000170703 | <chem>C1(Oc2ccccc2)=C(C)Oc(c3C1=O)cc(cc3C)O</chem>                       | >15.0150                              | >15.0150 | >27.1739                            |
| SJ000170877 | <chem>C(Oc1ccccc1F)(=COc2c3ccc(OC(C)=O)c2C)C3=O</chem>                   | >15.0150                              | >15.0150 | >27.1739                            |
| SJ000174499 | <chem>c(ccc(c1C)O)(C2=O)c1OC=C2Oc(cc3)ccc3F</chem>                       | >15.0150                              | >15.0150 | >27.1739                            |
| SJ000175490 | <chem>C1(Oc(ccc(c23)cccc2)c3)=COc(c4C1=O)cc(cc4)O</chem>                 | >15.0150                              | >15.0150 | >27.1739                            |
| SJ000176490 | <chem>C1(=O)c(ccc(c2C)O)c2OC(C)=C1c3ccc(cc3)OC</chem>                    | >15.0150                              | >15.0150 | >27.1739                            |
| SJ000206080 | <chem>C1(C2c3ccccc(O)c3)=C(Oc(cccc4)c4C1=O)C(N2C)=O</chem>               | >19.0390                              | >19.0390 | >34.4565                            |
| SJ000290740 | <chem>C1(Oc(cc2)ccc2OC)=COc(c3C1=O)cc(cc3)O</chem>                       | >15.0150                              | >15.0150 | >27.1739                            |
| SJ000565131 | <chem>C1(Oc(cc2)ccc2C(OC)=O)=C(C)Oc3c(ccc(O)c3)C1=O</chem>               | >15.0150                              | >15.0150 | >27.1739                            |
| SJ000565132 | <chem>C1(Oc(cc2)ccc2C(O)=O)=COc(c3C1=O)cc(cc3)OC</chem>                  | >15.0150                              | >15.0150 | >27.1739                            |
| SJ000565133 | <chem>C1(C(=O)CC(CC1=O)(C)C)(C2c3ccc(cc3)OC)OC(=C24)CC(CC4=O)(C)C</chem> | >15.0150                              | >15.0150 | >27.1739                            |
| SJ000565134 | <chem>c12c(cc(OC(C)C(OC)=O)cc1O)OC(=CC2=O)c3ccccc3</chem>                | >15.0150                              | >15.0150 | >27.1739                            |
| SJ000565135 | <chem>C1(Oc(cc(C)cc2C)c2)=COc(c3C1=O)cc(cc3)O</chem>                     | >15.0150                              | >15.0150 | >27.1739                            |
| SJ000565136 | <chem>C1(Oc2cccc(C)c2)=COc(c3C1=O)cc(cc3)O</chem>                        | >15.0150                              | >15.0150 | >27.1739                            |
| SJ000565137 | <chem>C1(c2ccccc2Cl)=C(C)Oc3c(ccc(O)c3O)C1=O</chem>                      | >15.0150                              | >15.0150 | >27.1739                            |
| SJ000565138 | <chem>C1(Oc2ccccc2F)=COc(c3C1=O)cc(cc3)OC</chem>                         | >15.0150                              | >15.0150 | >27.1739                            |
| SJ000565139 | <chem>C(Oc(cc1)ccc1F)(=C(C)O2)C(=O)c(c23)ccc(O)c</chem>                  | >15.0150                              | >15.0150 | >27.1739                            |

|             | 30                                               |          |          |          |
|-------------|--------------------------------------------------|----------|----------|----------|
| SJ000565140 | C1(=O)c(ccc(c2C)O)c2OC(C)=C1c3ccccc3             | >15.0150 | >15.0150 | >27.1739 |
| SJ000565141 | C1(Oc(cc2)ccc2C)=COc(c3C1=O)cc(cc3)O             | >15.0150 | >15.0150 | >27.1739 |
| SJ000565142 | C(Oc1ccccc1F)(=COc(c23)cc(c(CC)c2)O)C3=O         | >15.0150 | >15.0150 | >27.1739 |
| SJ000565143 | C(Oc(cc1)ccc1F)(=C(C)O2)C(=O)c(c23)ccc(O)c3C     | >15.0150 | >15.0150 | >27.1739 |
| SJ000565144 | C1(=COc(c2C1=O)cc(cc2)O)Oc3cc(C)ccc3C            | >15.0150 | >15.0150 | >27.1739 |
| SJ000565145 | C1(Oc(cc2)ccc2C(C)C)=COc(c3C1=O)cc(cc3)O         | >15.0150 | >15.0150 | >27.1739 |
| SJ000565146 | C(c1ccc(cc1)OCC)(Oc(ccc(c2)O)c2C3=O)=C3          | >15.0150 | >15.0150 | >27.1739 |
| SJ000565147 | C1(c2ccc(c(OCC)c2)O)=CC(c3c(cccc3)O1)=O          | >15.0150 | >15.0150 | >27.1739 |
| SJ000565148 | C1(c2ccccc2OC)=C(CC)Oc3c(ccc(O)c3)C1=O           | >15.0150 | >15.0150 | >27.1739 |
| SJ000565149 | C1(c2ccc(c(O)c2)OC)=C(C)Oc3c(ccc(O)c3)C1=O       | >15.0150 | >15.0150 | >27.1739 |
| SJ000565150 | C1(Oc2cccc(OC)c2)=COc(c3C1=O)cc(cc3)OC           | >15.0150 | >15.0150 | >27.1739 |
| SJ000565151 | C1(Oc(cc2)ccc2OCC)=C(C)Oc3c(ccc(O)c3)C1=O        | >15.0150 | >15.0150 | >27.1739 |
| SJ000565152 | C1(Oc2ccccc2CC)=COc(c3C1=O)cc(cc3)O              | >15.0150 | >15.0150 | >27.1739 |
| SJ000565153 | C1(c(ccc(c23)OCO2)c3)=C(O)C(c(ccc(Cl)c4)c4O1)=O  | >15.0150 | >15.0150 | >27.1739 |
| SJ000565154 | C1(c2ccccc2OC)=C(O)C(c(ccc(Cl)c3)c3O1)=O         | >15.0150 | >15.0150 | >27.1739 |
| SJ000565155 | C1(C2c3ccc(cc3)O)=C(Oc(ccc(Cl)c4)c4C1=O)C(N2C)=O | >15.3754 | >15.3754 | >27.8261 |
| SJ000565156 | C1(C2c3cccc(O)c3)=C(Oc(ccc(Cl)c4)c4C1=O)C(N2C)=O | >12.2823 | >12.2823 | >22.2283 |

**Supplementary Table 5.** Novel scaffolds found in confirmed 25 virtual screening hits.

| Parent Chemical REGNUM | Core Structure                                  |
|------------------------|-------------------------------------------------|
| SJ000565000            | C(OC(C1CCNC2CCCC12)C3CC4CCN3CC4)C5CC5           |
| SJ000565062            | C1CCC2CCCCC2C1                                  |
| SJ000565033            | C1CCC(CC1)NC2CCNC3CCCC23                        |
| SJ000173328            | C1CCC2C(CCNC2C1)NC3CCC4OCCOC4C3                 |
| SJ000565039            | C(CNCC1CCCC1)COC2CCCC2                          |
| SJ000565115            | C(CC1CCCC1)NCC2CCC(CC2)OCC3CCCC3                |
| SJ000565043            | C1CCC(CC1)NC2CCNC3C4CCCC4CCC23                  |
| SJ000205073            | C(CC1CCCC1)NCC2CCCC2                            |
| SJ000565072            | C(COC1CCC(CC2CCCC2)CC1)CN3CCNC3                 |
| SJ000188975            | C(COC1CCCC1)CN2CCC3CCCC3C2                      |
| SJ000565117            | C(CCN1CCNC1)COC2CCCC2CC3CCCC3                   |
| SJ000565031            | C1CCC(CC1)NC2C3CCCC3NC4CCCC24                   |
| SJ000150414            | C(CC1CCCC1)CC2CCCC2                             |
| SJ000564998            | C(C1CCCC1)C2NCCC3CCCC23                         |
| SJ000565010            | C(CCOC1CCC2CCCC2C1)CCN3CCCC3                    |
| SJ000202592            | C(C1CCCC1)C2CCCC2                               |
| SJ000565067            | C(CCN1CCCC1)COC2CCCC2C3CCCC3                    |
| SJ000183110            | C(CCOC1CCCC1)CNCC2CCCC2                         |
| SJ000565003            | C(CC(C1CCCC1)C2CCCC2)NCC3(CCOCC3)C4CCC5OCCOC5C4 |
| SJ000565071            | C(CCN1CCCC1)COC2CCC(CC3CCCC3)CC2                |
| SJ000565094            | C(COC1CCC(CC1)OCC2CCCC2)CN3CCCC3                |
| SJ000565064            | C1CCC(CC1)N2CCCN2C3CCCC3                        |

**Supplementary Table 6.** Dose response behavior of confirmed 25 virtual screening hits.

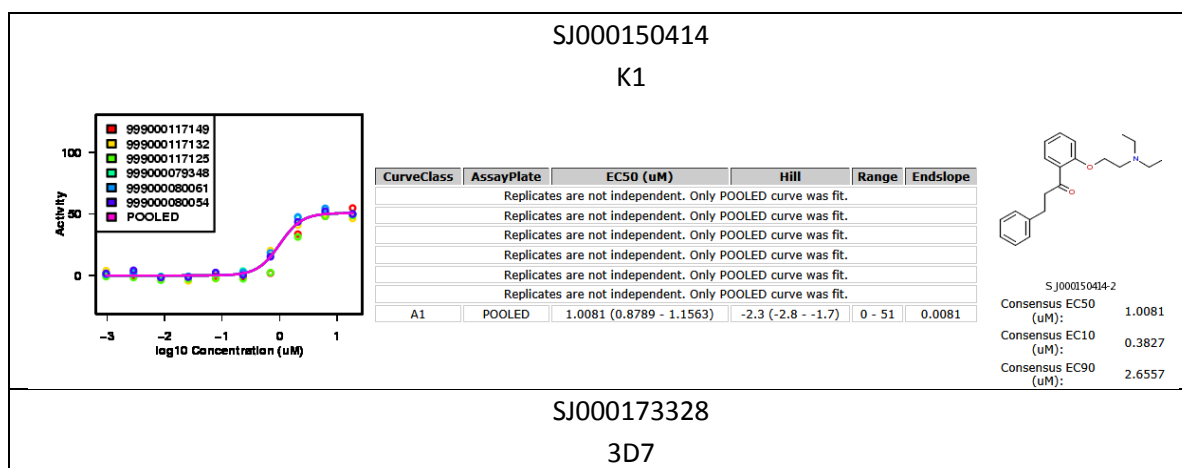

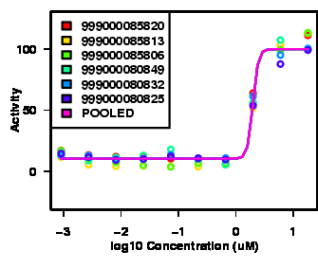

| CurveClass | AssayPlate | EC50 (uM)                | Hill                                                       | Range    | Endslope |
|------------|------------|--------------------------|------------------------------------------------------------|----------|----------|
|            |            |                          | Replicates are not independent. Only POOLED curve was fit. |          |          |
|            |            |                          | Replicates are not independent. Only POOLED curve was fit. |          |          |
|            |            |                          | Replicates are not independent. Only POOLED curve was fit. |          |          |
|            |            |                          | Replicates are not independent. Only POOLED curve was fit. |          |          |
|            |            |                          | Replicates are not independent. Only POOLED curve was fit. |          |          |
|            |            |                          | Replicates are not independent. Only POOLED curve was fit. |          |          |
|            |            |                          | Replicates are not independent. Only POOLED curve was fit. |          |          |
|            |            |                          | Replicates are not independent. Only POOLED curve was fit. |          |          |
|            |            |                          | Replicates are not independent. Only POOLED curve was fit. |          |          |
|            |            |                          | Replicates are not independent. Only POOLED curve was fit. |          |          |
| A1         | POOLED     | 1.9858 (1.8936 - 2.0825) | -9.6 (-83.8 - 64.7)                                        | 10 - 100 | 0.0000   |

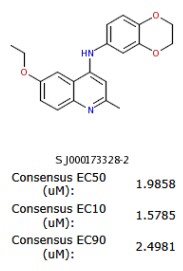

SJ000183110  
K1

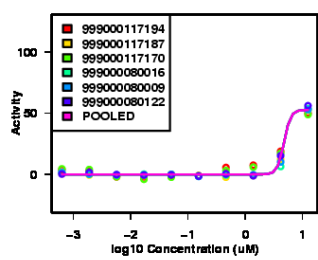

| CurveClass | AssayPlate | EC50 (uM)                 | Hill                                                       | Range  | Endslope |
|------------|------------|---------------------------|------------------------------------------------------------|--------|----------|
|            |            |                           | Replicates are not independent. Only POOLED curve was fit. |        |          |
|            |            |                           | Replicates are not independent. Only POOLED curve was fit. |        |          |
|            |            |                           | Replicates are not independent. Only POOLED curve was fit. |        |          |
|            |            |                           | Replicates are not independent. Only POOLED curve was fit. |        |          |
|            |            |                           | Replicates are not independent. Only POOLED curve was fit. |        |          |
|            |            |                           | Replicates are not independent. Only POOLED curve was fit. |        |          |
|            |            |                           | Replicates are not independent. Only POOLED curve was fit. |        |          |
|            |            |                           | Replicates are not independent. Only POOLED curve was fit. |        |          |
|            |            |                           | Replicates are not independent. Only POOLED curve was fit. |        |          |
|            |            |                           | Replicates are not independent. Only POOLED curve was fit. |        |          |
| A1         | POOLED     | 4.7387 (1.9685 - 11.4070) | -7.6 (-56.3 - 41.1)                                        | 0 - 53 | 0.0210   |

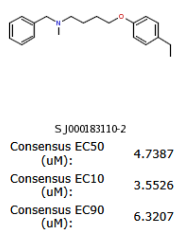

SJ000188975  
3D7

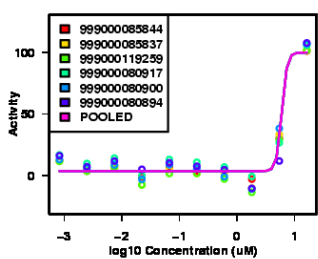

| CurveClass | AssayPlate | EC50 (uM)                 | Hill                                                       | Range   | Endslope |
|------------|------------|---------------------------|------------------------------------------------------------|---------|----------|
|            |            |                           | Replicates are not independent. Only POOLED curve was fit. |         |          |
|            |            |                           | Replicates are not independent. Only POOLED curve was fit. |         |          |
|            |            |                           | Replicates are not independent. Only POOLED curve was fit. |         |          |
|            |            |                           | Replicates are not independent. Only POOLED curve was fit. |         |          |
|            |            |                           | Replicates are not independent. Only POOLED curve was fit. |         |          |
|            |            |                           | Replicates are not independent. Only POOLED curve was fit. |         |          |
|            |            |                           | Replicates are not independent. Only POOLED curve was fit. |         |          |
|            |            |                           | Replicates are not independent. Only POOLED curve was fit. |         |          |
|            |            |                           | Replicates are not independent. Only POOLED curve was fit. |         |          |
|            |            |                           | Replicates are not independent. Only POOLED curve was fit. |         |          |
| A1         | POOLED     | 6.0279 (2.5452 - 14.2762) | -9.7 (-91.6 - 72.2)                                        | 4 - 100 | 0.0036   |

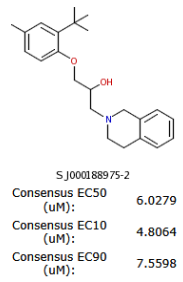

K1

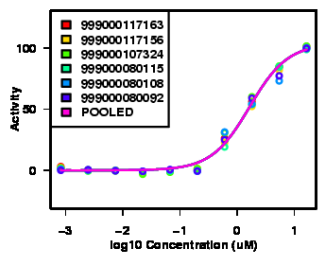

| CurveClass | AssayPlate | EC50 (uM)                | Hill                                                       | Range   | Endslope |
|------------|------------|--------------------------|------------------------------------------------------------|---------|----------|
|            |            |                          | Replicates are not independent. Only POOLED curve was fit. |         |          |
|            |            |                          | Replicates are not independent. Only POOLED curve was fit. |         |          |
|            |            |                          | Replicates are not independent. Only POOLED curve was fit. |         |          |
|            |            |                          | Replicates are not independent. Only POOLED curve was fit. |         |          |
|            |            |                          | Replicates are not independent. Only POOLED curve was fit. |         |          |
|            |            |                          | Replicates are not independent. Only POOLED curve was fit. |         |          |
|            |            |                          | Replicates are not independent. Only POOLED curve was fit. |         |          |
|            |            |                          | Replicates are not independent. Only POOLED curve was fit. |         |          |
|            |            |                          | Replicates are not independent. Only POOLED curve was fit. |         |          |
|            |            |                          | Replicates are not independent. Only POOLED curve was fit. |         |          |
| B1         | POOLED     | 1.6561 (1.2402 - 2.2115) | -1.3 (-1.6 - -1.0)                                         | 0 - 104 | 0.3786   |

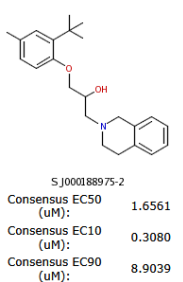

SJ000202592  
K1

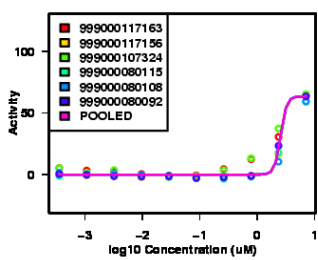

| CurveClass | AssayPlate | EC50 (uM)                | Hill                                                       | Range  | Endslope |
|------------|------------|--------------------------|------------------------------------------------------------|--------|----------|
|            |            |                          | Replicates are not independent. Only POOLED curve was fit. |        |          |
|            |            |                          | Replicates are not independent. Only POOLED curve was fit. |        |          |
|            |            |                          | Replicates are not independent. Only POOLED curve was fit. |        |          |
|            |            |                          | Replicates are not independent. Only POOLED curve was fit. |        |          |
|            |            |                          | Replicates are not independent. Only POOLED curve was fit. |        |          |
|            |            |                          | Replicates are not independent. Only POOLED curve was fit. |        |          |
|            |            |                          | Replicates are not independent. Only POOLED curve was fit. |        |          |
|            |            |                          | Replicates are not independent. Only POOLED curve was fit. |        |          |
|            |            |                          | Replicates are not independent. Only POOLED curve was fit. |        |          |
|            |            |                          | Replicates are not independent. Only POOLED curve was fit. |        |          |
| A1         | POOLED     | 2.5655 (1.4744 - 4.4640) | -8.4 (-62.0 - 45.2)                                        | 0 - 64 | 0.0149   |

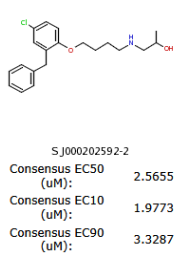

SJ000205073

3D7

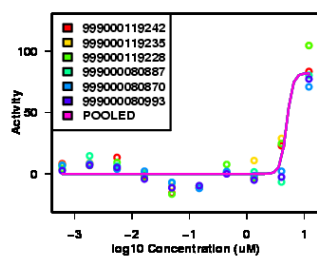

| CurveClass | AssayPlate | EC50 (uM)                                                  | Hill                  | Range  | Endslope |
|------------|------------|------------------------------------------------------------|-----------------------|--------|----------|
|            |            | Replicates are not independent. Only POOLED curve was fit. |                       |        |          |
|            |            | Replicates are not independent. Only POOLED curve was fit. |                       |        |          |
|            |            | Replicates are not independent. Only POOLED curve was fit. |                       |        |          |
|            |            | Replicates are not independent. Only POOLED curve was fit. |                       |        |          |
|            |            | Replicates are not independent. Only POOLED curve was fit. |                       |        |          |
|            |            | Replicates are not independent. Only POOLED curve was fit. |                       |        |          |
| B1         | POOLED     | 4.9445 (0.0111 - 1204.2042)                                | -8.2 (-247.3 - 230.9) | 0 - 82 | 0.0374   |

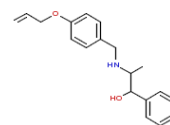

SJ000205073-2  
 Consensus EC50 (uM): 4.9445  
 Consensus EC10 (uM): 3.7836  
 Consensus EC90 (uM): 6.4616

SJ000564998

K1

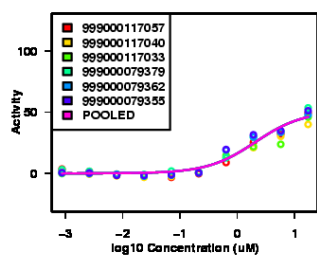

| CurveClass | AssayPlate | EC50 (uM)                                                  | Hill               | Range  | Endslope |
|------------|------------|------------------------------------------------------------|--------------------|--------|----------|
|            |            | Replicates are not independent. Only POOLED curve was fit. |                    |        |          |
|            |            | Replicates are not independent. Only POOLED curve was fit. |                    |        |          |
|            |            | Replicates are not independent. Only POOLED curve was fit. |                    |        |          |
|            |            | Replicates are not independent. Only POOLED curve was fit. |                    |        |          |
|            |            | Replicates are not independent. Only POOLED curve was fit. |                    |        |          |
|            |            | Replicates are not independent. Only POOLED curve was fit. |                    |        |          |
| B1         | POOLED     | 2.0551 (0.6502 - 6.4952)                                   | -1.0 (-1.7 - -0.4) | 0 - 51 | 0.2758   |

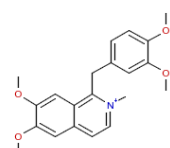

SJ000564998-1  
 Consensus EC50 (uM): 2.0551  
 Consensus EC10 (uM): 0.2510  
 Consensus EC90 (uM): 16.8253

SJ000565000

3D7

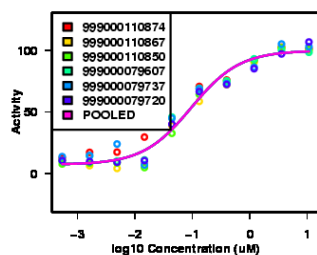

| CurveClass | AssayPlate | EC50 (uM)                                                  | Hill               | Range   | Endslope |
|------------|------------|------------------------------------------------------------|--------------------|---------|----------|
|            |            | Replicates are not independent. Only POOLED curve was fit. |                    |         |          |
|            |            | Replicates are not independent. Only POOLED curve was fit. |                    |         |          |
|            |            | Replicates are not independent. Only POOLED curve was fit. |                    |         |          |
|            |            | Replicates are not independent. Only POOLED curve was fit. |                    |         |          |
|            |            | Replicates are not independent. Only POOLED curve was fit. |                    |         |          |
|            |            | Replicates are not independent. Only POOLED curve was fit. |                    |         |          |
| A1         | POOLED     | 0.0956 (0.0582 - 0.1572)                                   | -1.0 (-1.5 - -0.6) | 7 - 100 | 0.0677   |

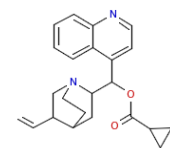

SJ000565000-1  
 Consensus EC50 (uM): 0.0956  
 Consensus EC10 (uM): 0.0114  
 Consensus EC90 (uM): 0.7994

K1

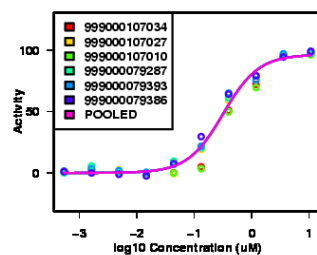

| CurveClass | AssayPlate | EC50 (uM)                                                  | Hill               | Range  | Endslope |
|------------|------------|------------------------------------------------------------|--------------------|--------|----------|
|            |            | Replicates are not independent. Only POOLED curve was fit. |                    |        |          |
|            |            | Replicates are not independent. Only POOLED curve was fit. |                    |        |          |
|            |            | Replicates are not independent. Only POOLED curve was fit. |                    |        |          |
|            |            | Replicates are not independent. Only POOLED curve was fit. |                    |        |          |
|            |            | Replicates are not independent. Only POOLED curve was fit. |                    |        |          |
|            |            | Replicates are not independent. Only POOLED curve was fit. |                    |        |          |
| A1         | POOLED     | 0.3178 (0.2477 - 0.4079)                                   | -1.4 (-1.8 - -1.0) | 0 - 97 | 0.0886   |

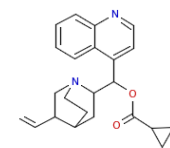

SJ000565000-1  
 Consensus EC50 (uM): 0.3178  
 Consensus EC10 (uM): 0.0671  
 Consensus EC90 (uM): 1.5057

SJ000565002

3D7

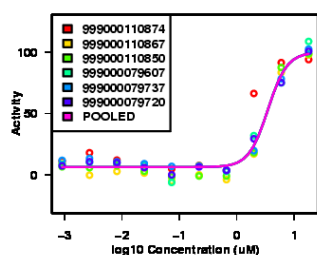

| CurveClass | AssayPlate | EC50 (uM)                                                  | Hill               | Range   | Endslope |
|------------|------------|------------------------------------------------------------|--------------------|---------|----------|
|            |            | Replicates are not independent. Only POOLED curve was fit. |                    |         |          |
|            |            | Replicates are not independent. Only POOLED curve was fit. |                    |         |          |
|            |            | Replicates are not independent. Only POOLED curve was fit. |                    |         |          |
|            |            | Replicates are not independent. Only POOLED curve was fit. |                    |         |          |
|            |            | Replicates are not independent. Only POOLED curve was fit. |                    |         |          |
|            |            | Replicates are not independent. Only POOLED curve was fit. |                    |         |          |
| A1         | POOLED     | 3.4873 (2.9123 - 4.1759)                                   | -2.6 (-3.4 - -1.8) | 6 - 100 | 0.1857   |

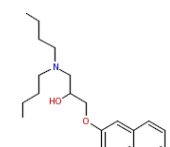

SJ000565002-1  
 Consensus EC50 (uM): 3.4873  
 Consensus EC10 (uM): 1.5056  
 Consensus EC90 (uM): 8.0775



K1

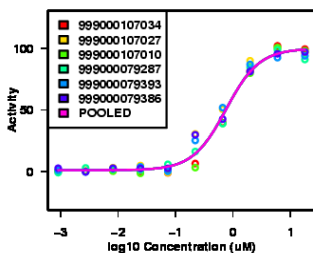

| CurveClass | AssayPlate | EC50 (uM)                | Hill                                                       | Range   | Endslope |
|------------|------------|--------------------------|------------------------------------------------------------|---------|----------|
|            |            |                          | Replicates are not independent. Only POOLED curve was fit. |         |          |
|            |            |                          | Replicates are not independent. Only POOLED curve was fit. |         |          |
|            |            |                          | Replicates are not independent. Only POOLED curve was fit. |         |          |
|            |            |                          | Replicates are not independent. Only POOLED curve was fit. |         |          |
|            |            |                          | Replicates are not independent. Only POOLED curve was fit. |         |          |
|            |            |                          | Replicates are not independent. Only POOLED curve was fit. |         |          |
| A1         | POOLED     | 0.7575 (0.6156 - 0.9323) | -1.5 (-1.9 - -1.1)                                         | 1 - 100 | 0.0707   |

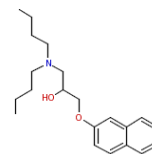

SJ000565002-1  
 Consensus EC50 (uM): 0.7575  
 Consensus EC10 (uM): 0.1756  
 Consensus EC90 (uM): 3.2675

SJ000565003

K1

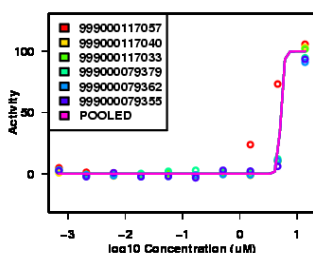

| CurveClass | AssayPlate | EC50 (uM)                 | Hill                                                       | Range   | Endslope |
|------------|------------|---------------------------|------------------------------------------------------------|---------|----------|
|            |            |                           | Replicates are not independent. Only POOLED curve was fit. |         |          |
|            |            |                           | Replicates are not independent. Only POOLED curve was fit. |         |          |
|            |            |                           | Replicates are not independent. Only POOLED curve was fit. |         |          |
|            |            |                           | Replicates are not independent. Only POOLED curve was fit. |         |          |
|            |            |                           | Replicates are not independent. Only POOLED curve was fit. |         |          |
|            |            |                           | Replicates are not independent. Only POOLED curve was fit. |         |          |
| A1         | POOLED     | 5.2169 (1.4102 - 19.2989) | -16.5 (-183.6 - 150.6)                                     | 0 - 100 | 0.0000   |

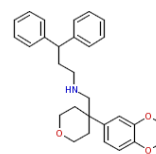

SJ000565003-1  
 Consensus EC50 (uM): 5.2169  
 Consensus EC10 (uM): 4.5665  
 Consensus EC90 (uM): 5.9599

SJ000565010

K1

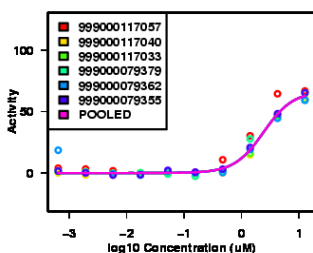

| CurveClass | AssayPlate | EC50 (uM)                | Hill                                                       | Range  | Endslope |
|------------|------------|--------------------------|------------------------------------------------------------|--------|----------|
|            |            |                          | Replicates are not independent. Only POOLED curve was fit. |        |          |
|            |            |                          | Replicates are not independent. Only POOLED curve was fit. |        |          |
|            |            |                          | Replicates are not independent. Only POOLED curve was fit. |        |          |
|            |            |                          | Replicates are not independent. Only POOLED curve was fit. |        |          |
|            |            |                          | Replicates are not independent. Only POOLED curve was fit. |        |          |
|            |            |                          | Replicates are not independent. Only POOLED curve was fit. |        |          |
| B1         | POOLED     | 2.4118 (2.0609 - 2.8224) | -1.7 (-2.0 - -1.4)                                         | 0 - 67 | 0.4705   |

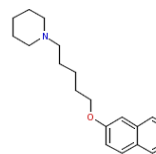

SJ000565010-1  
 Consensus EC50 (uM): 2.4118  
 Consensus EC10 (uM): 0.6695  
 Consensus EC90 (uM): 8.6884

SJ000565025

K1

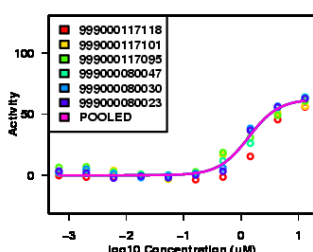

| CurveClass | AssayPlate | EC50 (uM)                | Hill                                                       | Range  | Endslope |
|------------|------------|--------------------------|------------------------------------------------------------|--------|----------|
|            |            |                          | Replicates are not independent. Only POOLED curve was fit. |        |          |
|            |            |                          | Replicates are not independent. Only POOLED curve was fit. |        |          |
|            |            |                          | Replicates are not independent. Only POOLED curve was fit. |        |          |
|            |            |                          | Replicates are not independent. Only POOLED curve was fit. |        |          |
|            |            |                          | Replicates are not independent. Only POOLED curve was fit. |        |          |
|            |            |                          | Replicates are not independent. Only POOLED curve was fit. |        |          |
| A1         | POOLED     | 1.3621 (1.1067 - 1.6764) | -1.7 (-2.1 - -1.2)                                         | 0 - 62 | 0.1751   |

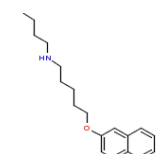

SJ000565025-1  
 Consensus EC50 (uM): 1.3621  
 Consensus EC10 (uM): 0.3642  
 Consensus EC90 (uM): 5.0950

SJ000565031

K1

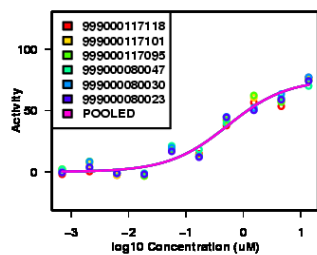

| CurveClass | AssayPlate | EC50 (uM)                | Hill                                                       | Range  | Endslope |
|------------|------------|--------------------------|------------------------------------------------------------|--------|----------|
|            |            |                          | Replicates are not independent. Only POOLED curve was fit. |        |          |
|            |            |                          | Replicates are not independent. Only POOLED curve was fit. |        |          |
|            |            |                          | Replicates are not independent. Only POOLED curve was fit. |        |          |
|            |            |                          | Replicates are not independent. Only POOLED curve was fit. |        |          |
|            |            |                          | Replicates are not independent. Only POOLED curve was fit. |        |          |
|            |            |                          | Replicates are not independent. Only POOLED curve was fit. |        |          |
|            |            |                          | Replicates are not independent. Only POOLED curve was fit. |        |          |
| B1         | POOLED     | 0.5332 (0.1464 - 1.9414) | -0.8 (-1.5 - -0.2)                                         | 0 - 76 | 0.2677   |

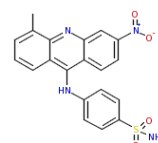

SJ00056031-1  
 Consensus EC50 (uM): 0.5332  
 Consensus EC10 (uM): 0.0391  
 Consensus EC90 (uM): 7.2625

### SJ000565033

3D7

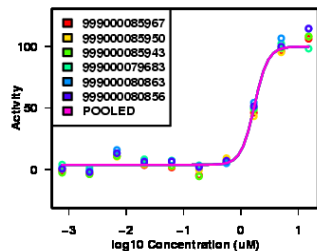

| CurveClass | AssayPlate | EC50 (uM)                | Hill                                                       | Range   | Endslope |
|------------|------------|--------------------------|------------------------------------------------------------|---------|----------|
|            |            |                          | Replicates are not independent. Only POOLED curve was fit. |         |          |
|            |            |                          | Replicates are not independent. Only POOLED curve was fit. |         |          |
|            |            |                          | Replicates are not independent. Only POOLED curve was fit. |         |          |
|            |            |                          | Replicates are not independent. Only POOLED curve was fit. |         |          |
|            |            |                          | Replicates are not independent. Only POOLED curve was fit. |         |          |
|            |            |                          | Replicates are not independent. Only POOLED curve was fit. |         |          |
|            |            |                          | Replicates are not independent. Only POOLED curve was fit. |         |          |
| A1         | POOLED     | 1.7216 (1.4875 - 1.9925) | -3.7 (-8.9 - 1.5)                                          | 4 - 100 | 0.0070   |

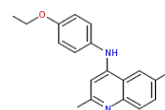

SJ000565033-1  
 Consensus EC50 (uM): 1.7216  
 Consensus EC10 (uM): 0.9566  
 Consensus EC90 (uM): 3.0981

K1

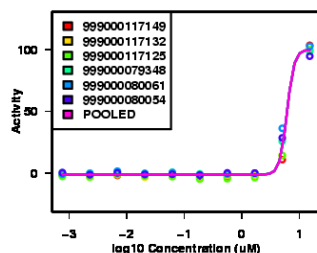

| CurveClass | AssayPlate | EC50 (uM)                | Hill                                                       | Range    | Endslope |
|------------|------------|--------------------------|------------------------------------------------------------|----------|----------|
|            |            |                          | Replicates are not independent. Only POOLED curve was fit. |          |          |
|            |            |                          | Replicates are not independent. Only POOLED curve was fit. |          |          |
|            |            |                          | Replicates are not independent. Only POOLED curve was fit. |          |          |
|            |            |                          | Replicates are not independent. Only POOLED curve was fit. |          |          |
|            |            |                          | Replicates are not independent. Only POOLED curve was fit. |          |          |
|            |            |                          | Replicates are not independent. Only POOLED curve was fit. |          |          |
|            |            |                          | Replicates are not independent. Only POOLED curve was fit. |          |          |
| A1         | POOLED     | 6.0942 (5.0955 - 7.2888) | -7.0 (-13.6 - -0.4)                                        | -1 - 100 | 0.0816   |

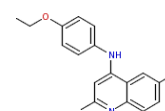

SJ000565033-1  
 Consensus EC50 (uM): 6.0942  
 Consensus EC10 (uM): 4.4495  
 Consensus EC90 (uM): 8.3470

### SJ000565039

3D7

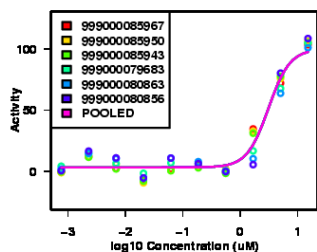

| CurveClass | AssayPlate | EC50 (uM)                | Hill                                                       | Range   | Endslope |
|------------|------------|--------------------------|------------------------------------------------------------|---------|----------|
|            |            |                          | Replicates are not independent. Only POOLED curve was fit. |         |          |
|            |            |                          | Replicates are not independent. Only POOLED curve was fit. |         |          |
|            |            |                          | Replicates are not independent. Only POOLED curve was fit. |         |          |
|            |            |                          | Replicates are not independent. Only POOLED curve was fit. |         |          |
|            |            |                          | Replicates are not independent. Only POOLED curve was fit. |         |          |
|            |            |                          | Replicates are not independent. Only POOLED curve was fit. |         |          |
|            |            |                          | Replicates are not independent. Only POOLED curve was fit. |         |          |
| B1         | POOLED     | 3.0999 (2.2839 - 4.2074) | -2.3 (-3.4 - -1.3)                                         | 3 - 100 | 0.3516   |

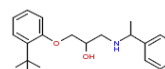

SJ000565039-1  
 Consensus EC50 (uM): 3.0999  
 Consensus EC10 (uM): 1.2140  
 Consensus EC90 (uM): 7.9155

K1

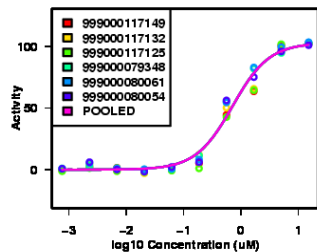

| CurveClass | AssayPlate | EC50 (uM)                | Hill                                                       | Range   | Endslope |
|------------|------------|--------------------------|------------------------------------------------------------|---------|----------|
|            |            |                          | Replicates are not independent. Only POOLED curve was fit. |         |          |
|            |            |                          | Replicates are not independent. Only POOLED curve was fit. |         |          |
|            |            |                          | Replicates are not independent. Only POOLED curve was fit. |         |          |
|            |            |                          | Replicates are not independent. Only POOLED curve was fit. |         |          |
|            |            |                          | Replicates are not independent. Only POOLED curve was fit. |         |          |
|            |            |                          | Replicates are not independent. Only POOLED curve was fit. |         |          |
|            |            |                          | Replicates are not independent. Only POOLED curve was fit. |         |          |
| A1         | POOLED     | 0.7109 (0.4441 - 1.1382) | -1.4 (-2.0 - -0.8)                                         | 0 - 103 | 0.1414   |

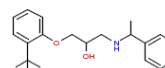

SJ000565039-1  
 Consensus EC50 (uM): 0.7109  
 Consensus EC10 (uM): 0.1414  
 Consensus EC90 (uM): 3.5754

### SJ000565043

### 3D7

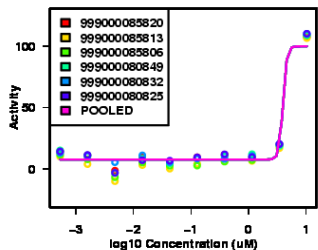

| CurveClass | AssayPlate | EC50 (uM)                                                  | Hill                   | Range   | Endslope |
|------------|------------|------------------------------------------------------------|------------------------|---------|----------|
|            |            | Replicates are not independent. Only POOLED curve was fit. |                        |         |          |
|            |            | Replicates are not independent. Only POOLED curve was fit. |                        |         |          |
|            |            | Replicates are not independent. Only POOLED curve was fit. |                        |         |          |
|            |            | Replicates are not independent. Only POOLED curve was fit. |                        |         |          |
|            |            | Replicates are not independent. Only POOLED curve was fit. |                        |         |          |
|            |            | Replicates are not independent. Only POOLED curve was fit. |                        |         |          |
| B1         | POOLED     | 3.9945 (0.2789 - 57.2061)                                  | -13.4 (-262.7 - 236.0) | 8 - 100 | 0.0003   |

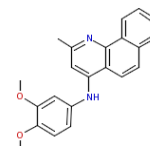

S\_J000565043-1  
 Consensus EC50 (uM): 3.9945  
 Consensus EC10 (uM): 3.3892  
 Consensus EC90 (uM): 4.7080

### SJ000565062

#### 3D7

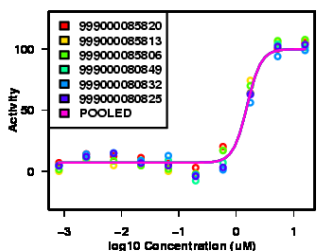

| CurveClass | AssayPlate | EC50 (uM)                                                  | Hill              | Range   | Endslope |
|------------|------------|------------------------------------------------------------|-------------------|---------|----------|
|            |            | Replicates are not independent. Only POOLED curve was fit. |                   |         |          |
|            |            | Replicates are not independent. Only POOLED curve was fit. |                   |         |          |
|            |            | Replicates are not independent. Only POOLED curve was fit. |                   |         |          |
|            |            | Replicates are not independent. Only POOLED curve was fit. |                   |         |          |
|            |            | Replicates are not independent. Only POOLED curve was fit. |                   |         |          |
|            |            | Replicates are not independent. Only POOLED curve was fit. |                   |         |          |
| A1         | POOLED     | 1.5466 (1.2257 - 1.9514)                                   | -3.6 (-7.5 - 0.4) | 7 - 100 | 0.0050   |

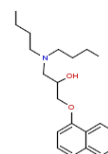

S\_J000565062-1  
 Consensus EC50 (uM): 1.5466  
 Consensus EC10 (uM): 0.8385  
 Consensus EC90 (uM): 2.8526

#### K1

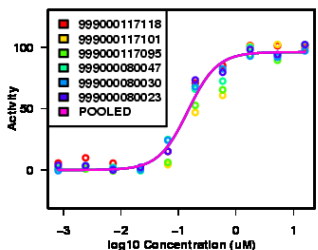

| CurveClass | AssayPlate | EC50 (uM)                                                  | Hill               | Range  | Endslope |
|------------|------------|------------------------------------------------------------|--------------------|--------|----------|
|            |            | Replicates are not independent. Only POOLED curve was fit. |                    |        |          |
|            |            | Replicates are not independent. Only POOLED curve was fit. |                    |        |          |
|            |            | Replicates are not independent. Only POOLED curve was fit. |                    |        |          |
|            |            | Replicates are not independent. Only POOLED curve was fit. |                    |        |          |
|            |            | Replicates are not independent. Only POOLED curve was fit. |                    |        |          |
|            |            | Replicates are not independent. Only POOLED curve was fit. |                    |        |          |
| A1         | POOLED     | 0.1457 (0.0992 - 0.2139)                                   | -1.7 (-2.8 - -0.6) | 0 - 96 | 0.0033   |

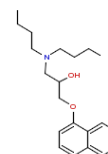

S\_J000565062-1  
 Consensus EC50 (uM): 0.1457  
 Consensus EC10 (uM): 0.0405  
 Consensus EC90 (uM): 0.5246

### SJ000565064

#### K1

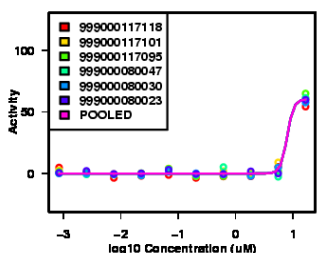

| CurveClass | AssayPlate | EC50 (uM)                                                  | Hill                 | Range  | Endslope |
|------------|------------|------------------------------------------------------------|----------------------|--------|----------|
|            |            | Replicates are not independent. Only POOLED curve was fit. |                      |        |          |
|            |            | Replicates are not independent. Only POOLED curve was fit. |                      |        |          |
|            |            | Replicates are not independent. Only POOLED curve was fit. |                      |        |          |
|            |            | Replicates are not independent. Only POOLED curve was fit. |                      |        |          |
|            |            | Replicates are not independent. Only POOLED curve was fit. |                      |        |          |
|            |            | Replicates are not independent. Only POOLED curve was fit. |                      |        |          |
| B1         | POOLED     | 7.9107 (0.0603 - 1038.0750)                                | -7.8 (-112.0 - 96.5) | 0 - 60 | 0.0900   |

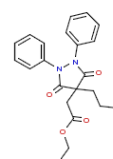

S\_J000565064-1  
 Consensus EC50 (uM): 7.9107  
 Consensus EC10 (uM): 5.9634  
 Consensus EC90 (uM): 10.4941

### SJ000565067

#### K1

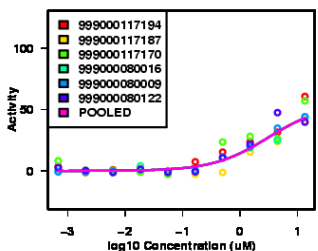

| CurveClass | AssayPlate | EC50 (uM)                                                  | Hill               | Range  | Endslope |
|------------|------------|------------------------------------------------------------|--------------------|--------|----------|
|            |            | Replicates are not independent. Only POOLED curve was fit. |                    |        |          |
|            |            | Replicates are not independent. Only POOLED curve was fit. |                    |        |          |
|            |            | Replicates are not independent. Only POOLED curve was fit. |                    |        |          |
|            |            | Replicates are not independent. Only POOLED curve was fit. |                    |        |          |
|            |            | Replicates are not independent. Only POOLED curve was fit. |                    |        |          |
|            |            | Replicates are not independent. Only POOLED curve was fit. |                    |        |          |
| B1         | POOLED     | 3.1098 (0.8048 - 12.0166)                                  | -0.9 (-1.4 - -0.4) | 0 - 54 | 0.6041   |

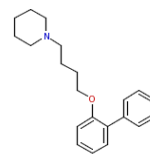

S\_J000565067-1  
 Consensus EC50 (uM): 3.1098  
 Consensus EC10 (uM): 0.2767  
 Consensus EC90 (uM): 34.9557



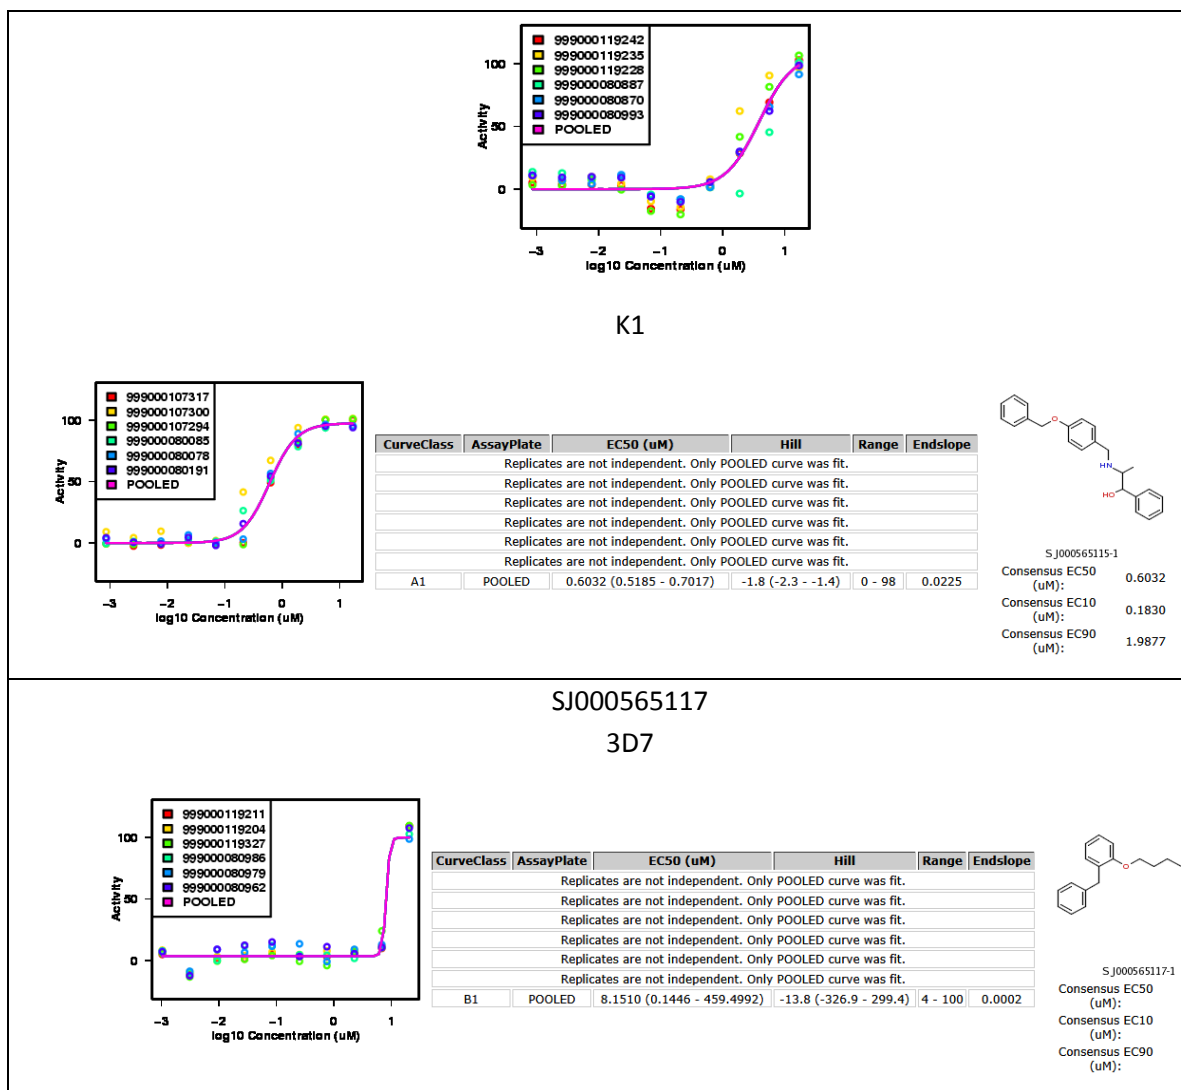

**Supplementary Table 7.** Purity information of 176 virtual screening hits<sup>‡</sup>.

| REGNUM      | Purity | Purity Method |
|-------------|--------|---------------|
| SJ000034041 | >95%   | UVTWC_ELSD    |
| SJ000039232 | >95%   | UVTWC_ELSD    |
| SJ000112434 | >95%   | UVTWC_ELSD    |
| SJ000113011 | >95%   | UVTWC_ELSD    |
| SJ000126082 | >95%   | UVTWC_ELSD    |
| SJ000146936 | >95%   | UVTWC_ELSD    |
| SJ000150414 | >95%   | UVTWC_ELSD    |
| SJ000156724 | >95%   | UVTWC_ELSD    |

<sup>‡</sup> Purity and identity of the compounds was confirmed at SJCRH by LC/UV/ELSD/MS with purity being measured as the average of that seen by UV and ELSD and identity being confirmed by MS. The details of purity assessment could be found in this paper: Dual Detection Approach to a More Accurate Measure of Relative Purity in High-Throughput Characterization of Compound Collections. Andrew Lemoff and Bing Yan. Journal of Combinatorial Chemistry. 2008, 10, (5), 746-751.

|             |        |            |
|-------------|--------|------------|
| SJ000158276 | >95%   | UVTWC_ELSD |
| SJ000158312 | >95%   | UVTWC_ELSD |
| SJ000166650 | >95%   | UVTWC_ELSD |
| SJ000173328 | >95%   | UVTWC_ELSD |
| SJ000177447 | >95%   | UVTWC_ELSD |
| SJ000183110 | >95%   | UVTWC_ELSD |
| SJ000188975 | >95%   | UVTWC_ELSD |
| SJ000196267 | >95%   | UVTWC_ELSD |
| SJ000197009 | >95%   | UVTWC_ELSD |
| SJ000197026 | 90-95% | UVTWC_ELSD |
| SJ000198578 | >95%   | UVTWC_ELSD |
| SJ000202592 | 90-95% | UVTWC_ELSD |
| SJ000203158 | 90-95% | UVTWC_ELSD |
| SJ000203427 | >95%   | UVTWC_ELSD |
| SJ000204340 | 90-95% | UVTWC_ELSD |
| SJ000204946 | >95%   | UVTWC_ELSD |
| SJ000205073 | >95%   | UVTWC_ELSD |
| SJ000208200 | >95%   | UVTWC_ELSD |
| SJ000299062 | 50-60% | UVTWC_ELSD |
| SJ000331443 | >95%   | UVTWC_ELSD |
| SJ000331940 | 85-90% | UVTWC_ELSD |
| SJ000333948 | 90-95% | UVTWC_ELSD |
| SJ000334022 | >95%   | UVTWC_ELSD |
| SJ000334045 | 85-90% | UVTWC_ELSD |
| SJ000334048 | >95%   | UVTWC_ELSD |
| SJ000334145 | >95%   | UVTWC_ELSD |
| SJ000334205 | >95%   | UVTWC_ELSD |
| SJ000334212 | 90-95% | UVTWC_ELSD |
| SJ000334298 | >95%   | UVTWC_ELSD |
| SJ000334362 | >95%   | UVTWC_ELSD |
| SJ000338135 | >95%   | UVTWC_ELSD |
| SJ000338146 | >95%   | UVTWC_ELSD |
| SJ000338434 | >95%   | UVTWC_ELSD |
| SJ000506625 | >95%   | UVTWC_ELSD |
| SJ000551062 | >95%   | UVTWC_ELSD |
| SJ000564998 | >95%   | UVTWC_ELSD |
| SJ000564999 | >95%   | UVTWC_ELSD |
| SJ000565000 | 80-85% | UVTWC_ELSD |
| SJ000565001 | >95%   | UVTWC_ELSD |
| SJ000565002 | >95%   | UVTWC_ELSD |
| SJ000565003 | >95%   | UVTWC_ELSD |
| SJ000565004 | >95%   | UVTWC_ELSD |
| SJ000565005 | >95%   | UVTWC_ELSD |
| SJ000565006 | >95%   | UVTWC_ELSD |
| SJ000565007 | >95%   | UVTWC_ELSD |

|             |        |            |
|-------------|--------|------------|
| SJ000565008 | >95%   | UVTWC_ELSD |
| SJ000565009 | >95%   | UVTWC_ELSD |
| SJ000565010 | >95%   | UVTWC_ELSD |
| SJ000565011 | >95%   | UVTWC_ELSD |
| SJ000565012 | 90-95% | UVTWC_ELSD |
| SJ000565013 | >95%   | UVTWC_ELSD |
| SJ000565014 | >95%   | UVTWC_ELSD |
| SJ000565015 | >95%   | UVTWC_ELSD |
| SJ000565016 | >95%   | UVTWC_ELSD |
| SJ000565017 | 85-90% | UVTWC_ELSD |
| SJ000565018 | >95%   | UVTWC_ELSD |
| SJ000565019 | >95%   | UVTWC_ELSD |
| SJ000565020 | >95%   | UVTWC_ELSD |
| SJ000565021 | >95%   | UVTWC_ELSD |
| SJ000565022 | >95%   | UVTWC_ELSD |
| SJ000565023 | >95%   | UVTWC_ELSD |
| SJ000565024 | >95%   | UVTWC_ELSD |
| SJ000565025 | >95%   | UVTWC_ELSD |
| SJ000565026 | >95%   | UVTWC_ELSD |
| SJ000565027 | >95%   | UVTWC_ELSD |
| SJ000565028 | 90-95% | UVTWC_ELSD |
| SJ000565029 | >95%   | UVTWC_ELSD |
| SJ000565030 | >95%   | UVTWC_ELSD |
| SJ000565031 | 90-95% | UVTWC_ELSD |
| SJ000565032 | >95%   | UVTWC_ELSD |
| SJ000565033 | >95%   | UVTWC_ELSD |
| SJ000565034 | >95%   | UVTWC_ELSD |
| SJ000565035 | 60-70% | UVTWC_ELSD |
| SJ000565036 | >95%   | UVTWC_ELSD |
| SJ000565037 | >95%   | UVTWC_ELSD |
| SJ000565038 | 90-95% | UVTWC_ELSD |
| SJ000565039 | >95%   | UVTWC_ELSD |
| SJ000565040 | 50-60% | UVTWC_ELSD |
| SJ000565041 | >95%   | UVTWC_ELSD |
| SJ000565042 | >95%   | UVTWC_ELSD |
| SJ000565043 | >95%   | UVTWC_ELSD |
| SJ000565044 | >95%   | UVTWC_ELSD |
| SJ000565045 | >95%   | UVTWC_ELSD |
| SJ000565046 | >95%   | UVTWC_ELSD |
| SJ000565047 | >95%   | UVTWC_ELSD |
| SJ000565048 | 90-95% | UVTWC_ELSD |
| SJ000565049 | >95%   | UVTWC_ELSD |
| SJ000565050 | >95%   | UVTWC_ELSD |
| SJ000565051 | >95%   | UVTWC_ELSD |
| SJ000565052 | >95%   | UVTWC_ELSD |

|             |        |            |
|-------------|--------|------------|
| SJ000565053 | 90-95% | UVTWC_ELSD |
| SJ000565054 | >95%   | UVTWC_ELSD |
| SJ000565055 | >95%   | UVTWC_ELSD |
| SJ000565056 | 90-95% | UVTWC_ELSD |
| SJ000565057 | >95%   | UVTWC_ELSD |
| SJ000565058 | >95%   | UVTWC_ELSD |
| SJ000565059 | >95%   | UVTWC_ELSD |
| SJ000565060 | >95%   | UVTWC_ELSD |
| SJ000565061 | 85-90% | UVTWC_ELSD |
| SJ000565062 | >95%   | UVTWC_ELSD |
| SJ000565063 | >95%   | UVTWC_ELSD |
| SJ000565064 | >95%   | UVTWC_ELSD |
| SJ000565065 | >95%   | UVTWC_ELSD |
| SJ000565066 | 50-60% | UVTWC_ELSD |
| SJ000565067 | >95%   | UVTWC_ELSD |
| SJ000565068 | >95%   | UVTWC_ELSD |
| SJ000565069 | 90-95% | UVTWC_ELSD |
| SJ000565070 | >95%   | UVTWC_ELSD |
| SJ000565071 | >95%   | UVTWC_ELSD |
| SJ000565072 | >95%   | UVTWC_ELSD |
| SJ000565073 | >95%   | UVTWC_ELSD |
| SJ000565074 | 90-95% | UVTWC_ELSD |
| SJ000565075 | 90-95% | UVTWC_ELSD |
| SJ000565076 | 70-80% | UVTWC_ELSD |
| SJ000565077 | >95%   | UVTWC_ELSD |
| SJ000565078 | >95%   | UVTWC_ELSD |
| SJ000565079 | >95%   | UVTWC_ELSD |
| SJ000565080 | >95%   | UVTWC_ELSD |
| SJ000565081 | 90-95% | UVTWC_ELSD |
| SJ000565082 | 90-95% | UVTWC_ELSD |
| SJ000565083 | >95%   | UVTWC_ELSD |
| SJ000565084 | >95%   | UVTWC_ELSD |
| SJ000565085 | >95%   | UVTWC_ELSD |
| SJ000565086 | >95%   | UVTWC_ELSD |
| SJ000565087 | >95%   | UVTWC_ELSD |
| SJ000565088 | >95%   | UVTWC_ELSD |
| SJ000565089 | >95%   | UVTWC_ELSD |
| SJ000565090 | >95%   | UVTWC_ELSD |
| SJ000565091 | >95%   | UVTWC_ELSD |
| SJ000565092 | >95%   | UVTWC_ELSD |
| SJ000565093 | >95%   | UVTWC_ELSD |
| SJ000565094 | >95%   | UVTWC_ELSD |
| SJ000565095 | 90-95% | UVTWC_ELSD |
| SJ000565096 | >95%   | UVTWC_ELSD |
| SJ000565097 | >95%   | UVTWC_ELSD |



|             |        |            |
|-------------|--------|------------|
| SJ000565098 | >95%   | UVTWC_ELSD |
| SJ000565099 | >95%   | UVTWC_ELSD |
| SJ000565100 | >95%   | UVTWC_ELSD |
| SJ000565101 | >95%   | UVTWC_ELSD |
| SJ000565102 | >95%   | UVTWC_ELSD |
| SJ000565103 | 90-95% | UVTWC_ELSD |
| SJ000565104 | >95%   | UVTWC_ELSD |
| SJ000565105 | 90-95% | UVTWC_ELSD |
| SJ000565106 | >95%   | UVTWC_ELSD |
| SJ000565107 | >95%   | UVTWC_ELSD |
| SJ000565108 | 85-90% | UVTWC_ELSD |
| SJ000565109 | >95%   | UVTWC_ELSD |
| SJ000565110 | >95%   | UVTWC_ELSD |
| SJ000565111 | >95%   | UVTWC_ELSD |
| SJ000565112 | >95%   | UVTWC_ELSD |
| SJ000565113 | >95%   | UVTWC_ELSD |
| SJ000565114 | >95%   | UVTWC_ELSD |
| SJ000565115 | >95%   | UVTWC_ELSD |
| SJ000565116 | >95%   | UVTWC_ELSD |
| SJ000565117 | 90-95% | UVTWC_ELSD |
| SJ000565118 | >95%   | UVTWC_ELSD |
| SJ000565119 | >95%   | UVTWC_ELSD |
| SJ000565120 | >95%   | UVTWC_ELSD |
| SJ000565121 | >95%   | UVTWC_ELSD |
| SJ000565122 | >95%   | UVTWC_ELSD |
| SJ000565123 | >95%   | UVTWC_ELSD |
| SJ000565124 | >95%   | UVTWC_ELSD |
| SJ000565125 | >95%   | UVTWC_ELSD |
| SJ000565126 | >95%   | UVTWC_ELSD |
| SJ000565127 | >95%   | UVTWC_ELSD |
| SJ000565128 | >95%   | UVTWC_ELSD |
| SJ000565129 | >95%   | UVTWC_ELSD |
| SJ000565130 | >95%   | UVTWC_ELSD |

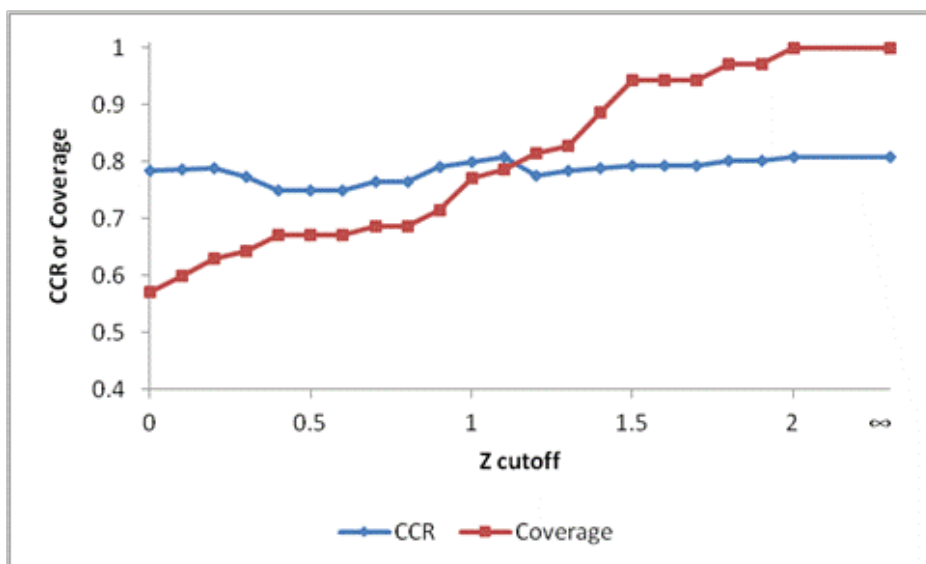

**Supplementary Figure 1.** Variability of CCR and coverage as a function of the applicability domain.
